# Supplementary material for: Identification of potential genetic risk factors for bipolar disorder by whole-exome sequencing
Source: PubMed Central journal article supplement (PMC6281607; doi:10.1038/s41398-018-0291-7), 2018-12-05
Supplement: 41398_2018_291_MOESM1_ESM.pdf [file 41398_2018_291_MOESM1_ESM.pdf]

| Sample    | Status | Chr | Position    | ID        | Ref | Alt | Type | Gene  | BaseChange |
|-----------|--------|-----|-------------|-----------|-----|-----|------|-------|------------|
| 24640     |        | 0   | 15 59430501 | chr15_594 | G   | T   | Mis2 | MYO1E | c.3146C>A  |
| PMD-BEL-( |        | 1   | 15 59430501 | chr15_594 | G   | T   | Mis2 | MYO1E | c.3146C>A  |
| 21005     |        | 0   | 15 59430501 | chr15_594 | G   | T   | Mis2 | MYO1E | c.3146C>A  |
| PMD-VIG-( |        | 1   | 15 59430501 | chr15_594 | G   | T   | Mis2 | MYO1E | c.3146C>A  |
| 21545     |        | 0   | 15 59453379 | chr15_594 | C   | T   | Mis3 | MYO1E | c.2678G>A  |
| 21213     |        | 0   | 15 59455458 | chr15_594 | T   | C   | Mis3 | MYO1E | c.2525A>G  |
| B00FWWL   |        | 0   | 15 59466086 | chr15_594 | C   | A   | Mis3 | MYO1E | c.2193G>T  |
| ROU-TRA-( |        | 0   | 15 59480359 | chr15_594 | G   | C   | Mis3 | MYO1E | c.1862C>G  |
| ROU-VER-( |        | 0   | 15 59480399 | chr15_594 | C   | T   | Mis2 | MYO1E | c.1822G>A  |
| 20084     |        | 0   | 15 59497600 | chr15_594 | G   | T   | Mis2 | MYO1E | c.1615C>A  |
| PMD-LEG-( |        | 1   | 15 59497600 | chr15_594 | G   | T   | Mis2 | MYO1E | c.1615C>A  |
| 20785     |        | 0   | 15 59497621 | chr15_594 | C   | T   | Mis3 | MYO1E | c.1594G>A  |
| 21035     |        | 0   | 15 59497622 | chr15_594 | G   | C   | Mis3 | MYO1E | c.1593C>G  |
| ROU-BID-4 |        | 0   | 15 59497622 | chr15_594 | G   | C   | Mis3 | MYO1E | c.1593C>G  |
| B00GG7M   |        | 0   | 15 59497622 | chr15_594 | G   | C   | Mis3 | MYO1E | c.1593C>G  |
| 21552     |        | 0   | 15 59497622 | chr15_594 | G   | C   | Mis3 | MYO1E | c.1593C>G  |
| PMD-LAI-0 |        | 1   | 15 59497622 | chr15_594 | G   | C   | Mis3 | MYO1E | c.1593C>G  |
| B00G74C   |        | 0   | 15 59497622 | chr15_594 | G   | C   | Mis3 | MYO1E | c.1593C>G  |
| 21632     |        | 0   | 15 59497622 | chr15_594 | G   | C   | Mis3 | MYO1E | c.1593C>G  |
| B00GG8K   |        | 0   | 15 59497622 | chr15_594 | G   | C   | Mis3 | MYO1E | c.1593C>G  |
| B00GQF5   |        | 0   | 15 59497622 | chr15_594 | G   | C   | Mis3 | MYO1E | c.1593C>G  |
| PMD-HER-  |        | 1   | 15 59497622 | chr15_594 | G   | C   | Mis3 | MYO1E | c.1593C>G  |
| B00G74L   |        | 0   | 15 59497622 | chr15_594 | G   | C   | Mis3 | MYO1E | c.1593C>G  |
| 21154     |        | 0   | 15 59497622 | chr15_594 | G   | C   | Mis3 | MYO1E | c.1593C>G  |
| B00G748   |        | 0   | 15 59497622 | chr15_594 | G   | C   | Mis3 | MYO1E | c.1593C>G  |
| PMD-LEF-( |        | 1   | 15 59497622 | chr15_594 | G   | C   | Mis3 | MYO1E | c.1593C>G  |
| 20261     |        | 0   | 15 59497622 | chr15_594 | G   | C   | Mis3 | MYO1E | c.1593C>G  |
| PMD-BAU-  |        | 1   | 15 59497622 | chr15_594 | G   | C   | Mis3 | MYO1E | c.1593C>G  |
| PMD-FRE-( |        | 1   | 15 59497622 | chr15_594 | G   | C   | Mis3 | MYO1E | c.1593C>G  |
| ROU-TIE-1 |        | 1   | 15 59497622 | chr15_594 | G   | C   | Mis3 | MYO1E | c.1593C>G  |
| PMD-DUC-  |        | 1   | 15 59510221 | chr15_595 | G   | A   | Mis3 | MYO1E | c.976C>T   |
| 24640     |        | 0   | 15 59519746 | chr15_595 | T   | C   | Mis2 | MYO1E | c.554A>G   |
| PMD-BEL-( |        | 1   | 15 59519746 | chr15_595 | T   | C   | Mis2 | MYO1E | c.554A>G   |
| 21005     |        | 0   | 15 59519746 | chr15_595 | T   | C   | Mis2 | MYO1E | c.554A>G   |
| B00G756   |        | 0   | 15 59519746 | chr15_595 | T   | C   | Mis2 | MYO1E | c.554A>G   |
| 22712     |        | 0   | 15 59519746 | chr15_595 | T   | C   | Mis2 | MYO1E | c.554A>G   |
| PMD-VIG-( |        | 1   | 15 59519746 | chr15_595 | T   | C   | Mis2 | MYO1E | c.554A>G   |
| 20431     |        | 0   | 15 59523987 | chr15_595 | C   | T   | Mis3 | MYO1E | c.424G>A   |
| 21086     |        | 0   | 15 59548493 | chr15_595 | C   | T   | Mis3 | MYO1E | c.322G>A   |
| B00FWXI   |        | 0   | 15 59553624 | chr15_595 | C   | T   | Mis3 | MYO1E | c.232G>A   |
| ROU-BOB-  |        | 0   | 15 59564546 | chr15_595 | C   | T   | Mis2 | MYO1E | c.106G>A   |







| Sample       | Status | Chr | Position | ID       | Ref         | Alt | Type |
|--------------|--------|-----|----------|----------|-------------|-----|------|
| B00G7K1      |        | 0   | 12       | 71898384 | chr12_71898 | T   | PTV  |
| PMis2-DEV-01 |        | 1   | 12       | 71898416 | chr12_71898 | A   | Mis2 |
| 20938        |        | 0   | 12       | 71898446 | chr12_71898 | C   | Mis3 |
| B00FWWI      |        | 0   | 12       | 71898446 | chr12_71898 | C   | Mis3 |
| 21770        |        | 0   | 12       | 71918244 | chr12_71918 | A   | Mis2 |
| 20487        |        | 0   | 12       | 71950407 | chr12_71950 | A   | Mis2 |
| ROU-AVE-144  |        | 0   | 12       | 71950407 | chr12_71950 | A   | Mis2 |
| PMis2-DUC-0  |        | 1   | 12       | 71950407 | chr12_71950 | A   | Mis2 |
| PMis2-LET-07 |        | 1   | 12       | 71950407 | chr12_71950 | A   | Mis2 |
| B00GG7Q      |        | 0   | 12       | 71950407 | chr12_71950 | A   | Mis2 |
| B00GG65      |        | 0   | 12       | 71965299 | chr12_71965 | T   | Mis3 |
| 21461        |        | 0   | 12       | 71971766 | chr12_71971 | C   | Mis3 |
| PMis2-DEL-08 |        | 1   | 12       | 71971766 | chr12_71971 | C   | Mis3 |
| PMis2-LOG-0  |        | 1   | 12       | 71971766 | chr12_71971 | C   | Mis3 |
| PMis2-PHO-0  |        | 1   | 12       | 71971766 | chr12_71971 | C   | Mis3 |
| PMis2-VIL-08 |        | 1   | 12       | 71971766 | chr12_71971 | C   | Mis3 |
| PMis2-LEN-09 |        | 1   | 12       | 71971766 | chr12_71971 | C   | Mis3 |
| B00FWXL      |        | 0   | 12       | 71971766 | chr12_71971 | C   | Mis3 |
| 21884        |        | 0   | 12       | 71971766 | chr12_71971 | C   | Mis3 |
| ROU-DEN-461  |        | 0   | 12       | 71972585 | chr12_71972 | G   | Mis2 |
| B00GG80      |        | 0   | 12       | 71972585 | chr12_71972 | G   | Mis2 |
| 20905        |        | 0   | 12       | 71972585 | chr12_71972 | G   | Mis2 |
| B00FWXB      |        | 0   | 12       | 71972585 | chr12_71972 | G   | Mis2 |
| 21160        |        | 0   | 12       | 71972585 | chr12_71972 | G   | Mis2 |
| B00G74N      |        | 0   | 12       | 71972585 | chr12_71972 | G   | Mis2 |
| B00FWXE      |        | 0   | 12       | 71972585 | chr12_71972 | G   | Mis2 |
| 20421        |        | 0   | 12       | 71972585 | chr12_71972 | G   | Mis2 |
| 20392        |        | 0   | 12       | 71972585 | chr12_71972 | G   | Mis2 |
| 20197        |        | 0   | 12       | 71972585 | chr12_71972 | G   | Mis2 |
| PMis2-LEG-07 |        | 1   | 12       | 71972585 | chr12_71972 | G   | Mis2 |
| ROU-PER-543  |        | 0   | 12       | 71972607 | chr12_71972 | C   | Mis3 |
| B00GWAQ      |        | 0   | 12       | 71972674 | chr12_71972 | G   | Mis3 |
| PMis2-DAN-0  |        | 1   | 12       | 71972674 | chr12_71972 | G   | Mis3 |
| 23410        |        | 0   | 12       | 71978131 | chr12_71978 | C   | Mis3 |
| 20804        |        | 0   | 12       | 71978131 | chr12_71978 | C   | Mis3 |
| 22036        |        | 0   | 12       | 71978131 | chr12_71978 | C   | Mis3 |
| 21406        |        | 0   | 12       | 71978131 | chr12_71978 | C   | Mis3 |
| 24066        |        | 0   | 12       | 71978131 | chr12_71978 | C   | Mis3 |
| 21701        |        | 0   | 12       | 71978131 | chr12_71978 | C   | Mis3 |
| ROU-CLA-516  |        | 0   | 12       | 71978131 | chr12_71978 | C   | Mis3 |
| 20455        |        | 0   | 12       | 71978131 | chr12_71978 | C   | Mis3 |











| Sample       | Status | Chr | Position | ID       | Ref         | Alt | Type |
|--------------|--------|-----|----------|----------|-------------|-----|------|
| B00GWAV      |        | 0   | 12       | 57866472 | chr12_57866 | C   | PTV  |
| B00FWY5      |        | 0   | 12       | 57867410 | chr12_57867 | C   | Mis2 |
| B00G74O      |        | 0   | 12       | 57867885 | chr12_57867 | G   | Mis3 |
| B00G74G      |        | 0   | 12       | 57867885 | chr12_57867 | G   | Mis3 |
| ROU-MAN-65   |        | 0   | 12       | 57867885 | chr12_57867 | G   | Mis3 |
| 21300        |        | 0   | 12       | 57867885 | chr12_57867 | G   | Mis3 |
| PMis2-SUB-0! |        | 1   | 12       | 57867885 | chr12_57867 | G   | Mis3 |
| B00GQD6      |        | 0   | 12       | 57867885 | chr12_57867 | G   | Mis3 |
| PMis2-SAN-0! |        | 1   | 12       | 57867885 | chr12_57867 | G   | Mis3 |
| B00GG8F      |        | 0   | 12       | 57867885 | chr12_57867 | G   | Mis3 |
| PMis2-BAT-0! |        | 1   | 12       | 57867885 | chr12_57867 | G   | Mis3 |
| PMis2-REU-0! |        | 1   | 12       | 57867885 | chr12_57867 | G   | Mis3 |
| 23054        |        | 0   | 12       | 57867885 | chr12_57867 | G   | Mis3 |
| 20521        |        | 0   | 12       | 57867926 | chr12_57867 | TC  | PTV  |
| B00FWWD      |        | 0   | 12       | 57868454 | chr12_57868 | C   | Mis3 |
| ROU-LEG-513  |        | 0   | 12       | 57869934 | chr12_57869 | G   | Mis3 |
| 21348        |        | 0   | 12       | 57870391 | chr12_57870 | T   | Mis3 |
| 22004        |        | 0   | 12       | 57871015 | chr12_57871 | C   | Mis2 |
| PMis2-VOY-0  |        | 1   | 12       | 57871049 | chr12_57871 | G   | Mis2 |
| B00G73X      |        | 0   | 12       | 57871049 | chr12_57871 | G   | Mis2 |
| B00G73O      |        | 0   | 12       | 57871247 | chr12_57871 | C   | Mis1 |
| B00GWAK      |        | 0   | 12       | 57871247 | chr12_57871 | C   | Mis1 |
| PMis2-HER-0! |        | 1   | 12       | 57871258 | chr12_57871 | C   | Mis1 |
| B00GG64      |        | 0   | 12       | 57871262 | chr12_57871 | G   | Mis3 |
| B00G73Z      |        | 0   | 12       | 57871313 | chr12_57871 | G   | Mis3 |
| B00G72X      |        | 0   | 12       | 57871321 | chr12_57871 | T   | Mis1 |
| B00G749      |        | 0   | 12       | 57871321 | chr12_57871 | T   | Mis1 |
| 20256        |        | 0   | 12       | 57871367 | chr12_57871 | G   | Mis3 |
| 21640        |        | 0   | 12       | 57871388 | chr12_57871 | G   | Mis3 |
| PMis2-BOH-0  |        | 1   | 12       | 57871388 | chr12_57871 | G   | Mis3 |
| 21280        |        | 0   | 12       | 57871388 | chr12_57871 | G   | Mis3 |
| B00G725      |        | 0   | 12       | 57871388 | chr12_57871 | G   | Mis3 |
| 20386        |        | 0   | 12       | 57871388 | chr12_57871 | G   | Mis3 |
| B00GQCR      |        | 0   | 12       | 57871388 | chr12_57871 | G   | Mis3 |
| 20759        |        | 0   | 12       | 57871388 | chr12_57871 | G   | Mis3 |
| 21093        |        | 0   | 12       | 57871388 | chr12_57871 | G   | Mis3 |
| PMis2-LEB-0€ |        | 1   | 12       | 57871388 | chr12_57871 | G   | Mis3 |
| ROU-LER-448  |        | 0   | 12       | 57871388 | chr12_57871 | G   | Mis3 |
| PMis2-GLA-0! |        | 1   | 12       | 57871388 | chr12_57871 | G   | Mis3 |
| PMis2-BOC-0  |        | 1   | 12       | 57871388 | chr12_57871 | G   | Mis3 |
| PMis2-FOL-0€ |        | 1   | 12       | 57872372 | chr12_57872 | C   | Mis1 |
| 21099        |        | 0   | 12       | 57872372 | chr12_57872 | C   | Mis1 |
| 24652        |        | 0   | 12       | 57872372 | chr12_57872 | C   | Mis1 |
| 21794        |        | 0   | 12       | 57872487 | chr12_57872 | T   | Mis1 |
| B00G7JH      |        | 0   | 12       | 57872537 | chr12_57872 | G   | Mis2 |
| 20453        |        | 0   | 12       | 57872892 | chr12_57872 | G   | PTV  |
| 22898        |        | 0   | 12       | 57872955 | chr12_57872 | G   | Mis3 |

| Gene    | BaseChange  | AChange     | Transcript  | OtherTranscr | MAF       | MAFControls | MAFCases |
|---------|-------------|-------------|-------------|--------------|-----------|-------------|----------|
| ARHGAP9 | c.2025-1G>A |             | NM_032496.. | PTV:NM_001   | 0.0004371 | 0.0004757   | 0        |
| ARHGAP9 | c.2000G>T   | p.Arg667Leu | NM_032496.. | Mis2:NM_001  | 0.0004371 | 0.0004757   | 0        |
| ARHGAP9 | c.1858C>T   | p.Arg620Trp | NM_032496.. | Mis3:NM_001  | 0.004808  | 0.00333     | 0.02174  |
| ARHGAP9 | c.1858C>T   | p.Arg620Trp | NM_032496.. | Mis3:NM_001  | 0.004808  | 0.00333     | 0.02174  |
| ARHGAP9 | c.1858C>T   | p.Arg620Trp | NM_032496.. | Mis3:NM_001  | 0.004808  | 0.00333     | 0.02174  |
| ARHGAP9 | c.1858C>T   | p.Arg620Trp | NM_032496.. | Mis3:NM_001  | 0.004808  | 0.00333     | 0.02174  |
| ARHGAP9 | c.1858C>T   | p.Arg620Trp | NM_032496.. | Mis3:NM_001  | 0.004808  | 0.00333     | 0.02174  |
| ARHGAP9 | c.1858C>T   | p.Arg620Trp | NM_032496.. | Mis3:NM_001  | 0.004808  | 0.00333     | 0.02174  |
| ARHGAP9 | c.1858C>T   | p.Arg620Trp | NM_032496.. | Mis3:NM_001  | 0.004808  | 0.00333     | 0.02174  |
| ARHGAP9 | c.1858C>T   | p.Arg620Trp | NM_032496.. | Mis3:NM_001  | 0.004808  | 0.00333     | 0.02174  |
| ARHGAP9 | c.1858C>T   | p.Arg620Trp | NM_032496.. | Mis3:NM_001  | 0.004808  | 0.00333     | 0.02174  |
| ARHGAP9 | c.1858C>T   | p.Arg620Trp | NM_032496.. | Mis3:NM_001  | 0.004808  | 0.00333     | 0.02174  |
| ARHGAP9 | c.1816delG  | p.Asp606fs  | NM_032496.. | PTV:NM_001   | 0.0004371 | 0.0004757   | 0        |
| ARHGAP9 | c.1684G>A   | p.Gly562Arg | NM_032496.. | Mis3:NM_001  | 0.0004371 | 0.0004757   | 0        |
| ARHGAP9 | c.1132C>T   | p.Arg378Trp | NM_032496.. | Mis3:NM_001  | 0.0004371 | 0.0004757   | 0        |
| ARHGAP9 | c.1007A>G   | p.Gln336Arg | NM_032496.. | Mis3:NM_001  | 0.0004371 | 0.0004757   | 0        |
| ARHGAP9 | c.794G>A    | p.Arg265Lys | NM_032496.. | Mis2:NM_001  | 0.0004371 | 0.0004757   | 0        |
| ARHGAP9 | c.760C>T    | p.Pro254Ser | NM_032496.. | Mis2:NM_001  | 0.0008741 | 0.0004757   | 0.005435 |
| ARHGAP9 | c.760C>T    | p.Pro254Ser | NM_032496.. | Mis2:NM_001  | 0.0008741 | 0.0004757   | 0.005435 |
| ARHGAP9 | c.751G>A    | p.Glu251Lys | NM_032496.. | Mis1:NM_001  | 0.0008741 | 0.0009515   | 0        |
| ARHGAP9 | c.751G>A    | p.Glu251Lys | NM_032496.. | Mis1:NM_001  | 0.0008741 | 0.0009515   | 0        |
| ARHGAP9 | c.740G>A    | p.Arg247His | NM_032496.. | Mis1:NM_001  | 0.0004371 | 0           | 0.005435 |
| ARHGAP9 | c.736C>T    | p.Arg246Cys | NM_032496.. | Mis3:NM_001  | 0.0004371 | 0.0004757   | 0        |
| ARHGAP9 | c.685C>T    | p.Arg229Cys | NM_032496.. | Mis3:NM_001  | 0.0004371 | 0.0004757   | 0        |
| ARHGAP9 | c.677A>G    | p.Asn226Ser | NM_032496.. | Mis1:NM_001  | 0.0008741 | 0.0009515   | 0        |
| ARHGAP9 | c.677A>G    | p.Asn226Ser | NM_032496.. | Mis1:NM_001  | 0.0008741 | 0.0009515   | 0        |
| ARHGAP9 | c.631C>T    | p.Pro211Ser | NM_032496.. | Mis3:NM_001  | 0.0004371 | 0.0004757   | 0        |
| ARHGAP9 | c.610C>T    | p.Pro204Ser | NM_032496.. | Mis3:NM_001  | 0.005245  | 0.003806    | 0.02174  |
| ARHGAP9 | c.610C>T    | p.Pro204Ser | NM_032496.. | Mis3:NM_001  | 0.005245  | 0.003806    | 0.02174  |
| ARHGAP9 | c.610C>T    | p.Pro204Ser | NM_032496.. | Mis3:NM_001  | 0.005245  | 0.003806    | 0.02174  |
| ARHGAP9 | c.610C>T    | p.Pro204Ser | NM_032496.. | Mis3:NM_001  | 0.005245  | 0.003806    | 0.02174  |
| ARHGAP9 | c.610C>T    | p.Pro204Ser | NM_032496.. | Mis3:NM_001  | 0.005245  | 0.003806    | 0.02174  |
| ARHGAP9 | c.610C>T    | p.Pro204Ser | NM_032496.. | Mis3:NM_001  | 0.005245  | 0.003806    | 0.02174  |
| ARHGAP9 | c.610C>T    | p.Pro204Ser | NM_032496.. | Mis3:NM_001  | 0.005245  | 0.003806    | 0.02174  |
| ARHGAP9 | c.610C>T    | p.Pro204Ser | NM_032496.. | Mis3:NM_001  | 0.005245  | 0.003806    | 0.02174  |
| ARHGAP9 | c.610C>T    | p.Pro204Ser | NM_032496.. | Mis3:NM_001  | 0.005245  | 0.003806    | 0.02174  |
| ARHGAP9 | c.610C>T    | p.Pro204Ser | NM_032496.. | Mis3:NM_001  | 0.005245  | 0.003806    | 0.02174  |
| ARHGAP9 | c.610C>T    | p.Pro204Ser | NM_032496.. | Mis3:NM_001  | 0.005245  | 0.003806    | 0.02174  |
| ARHGAP9 | c.610C>T    | p.Pro204Ser | NM_032496.. | Mis3:NM_001  | 0.005245  | 0.003806    | 0.02174  |
| ARHGAP9 | c.610C>T    | p.Pro204Ser | NM_032496.. | Mis3:NM_001  | 0.005245  | 0.003806    | 0.02174  |
| ARHGAP9 | c.485G>A    | p.Gly162Glu | NM_032496.. | Mis1:NM_001  | 0.001311  | 0.0009515   | 0.005435 |
| ARHGAP9 | c.485G>A    | p.Gly162Glu | NM_032496.. | Mis1:NM_001  | 0.001311  | 0.0009515   | 0.005435 |
| ARHGAP9 | c.485G>A    | p.Gly162Glu | NM_032496.. | Mis1:NM_001  | 0.001311  | 0.0009515   | 0.005435 |
| ARHGAP9 | c.370A>G    | p.Arg124Gly | NM_032496.. | Mis1:NM_001  | 0.0004371 | 0.0004757   | 0        |
| ARHGAP9 | c.320C>T    | p.Pro107Leu | NM_032496.. | Mis2:NM_001  | 0.0004371 | 0.0004757   | 0        |
| ARHGAP9 | c.298C>T    | p.Gln100*   | NM_032496.. | PTV:NM_001   | 0.0004371 | 0.0004757   | 0        |
| ARHGAP9 | c.235C>T    | p.Pro79Ser  | NM_032496.. | Mis3:NM_001  | 0.0004371 | 0.0004757   | 0        |



| ExAC_maxPO SIFT | Polyphen2_H Mutation_       | tas pLI score | gTEX_Mean_ | gTEX_mean_ | gTEX_mean_ |      |
|-----------------|-----------------------------|---------------|------------|------------|------------|------|
| NA              |                             | D             | 2.89E-09   | 6.51       | 1.44       | 8.16 |
| NA              | ,D,D,D,D,D,D.,P,P,B         | N,N           | 2.89E-09   | 6.51       | 1.44       | 8.16 |
| 0.0051          | D,D,D,D,D,D,I,D,D,D,D       | D             | 2.89E-09   | 6.51       | 1.44       | 8.16 |
| 0.0051          | D,D,D,D,D,D,I,D,D,D,D       | D             | 2.89E-09   | 6.51       | 1.44       | 8.16 |
| 0.0051          | D,D,D,D,D,D,I,D,D,D,D       | D             | 2.89E-09   | 6.51       | 1.44       | 8.16 |
| 0.0051          | D,D,D,D,D,D,I,D,D,D,D       | D             | 2.89E-09   | 6.51       | 1.44       | 8.16 |
| 0.0051          | D,D,D,D,D,D,I,D,D,D,D       | D             | 2.89E-09   | 6.51       | 1.44       | 8.16 |
| 0.0051          | D,D,D,D,D,D,I,D,D,D,D       | D             | 2.89E-09   | 6.51       | 1.44       | 8.16 |
| 0.0051          | D,D,D,D,D,D,I,D,D,D,D       | D             | 2.89E-09   | 6.51       | 1.44       | 8.16 |
| 0.0051          | D,D,D,D,D,D,I,D,D,D,D       | D             | 2.89E-09   | 6.51       | 1.44       | 8.16 |
| 0.0051          | D,D,D,D,D,D,I,D,D,D,D       | D             | 2.89E-09   | 6.51       | 1.44       | 8.16 |
| 0.0051          | D,D,D,D,D,D,I,D,D,D,D       | D             | 2.89E-09   | 6.51       | 1.44       | 8.16 |
| 0.0051          | D,D,D,D,D,D,I,D,D,D,D       | D             | 2.89E-09   | 6.51       | 1.44       | 8.16 |
| 0.0051          | D,D,D,D,D,D,I,D,D,D,D       | D             | 2.89E-09   | 6.51       | 1.44       | 8.16 |
| NA              |                             |               | 2.89E-09   | 6.51       | 1.44       | 8.16 |
| 0.0002          | D,D,D,D,D,D,I,D,D,D,D       | D             | 2.89E-09   | 6.51       | 1.44       | 8.16 |
| NA              | D,D,D,D,D,D,I,D,D,D,D       | D             | 2.89E-09   | 6.51       | 1.44       | 8.16 |
| NA              | D,D,D,D,D,D,I,P,B,B,B,B     | D             | 2.89E-09   | 6.51       | 1.44       | 8.16 |
| 0.0001          | T,T,D,T,T,T,T,I,D,D,D,P,B   | N             | 2.89E-09   | 6.51       | 1.44       | 8.16 |
| 9.756e-05       | T,T,T,T,T,T,T,I,D,B,P,P,P,B | D             | 2.89E-09   | 6.51       | 1.44       | 8.16 |
| 9.756e-05       | T,T,T,T,T,T,T,I,D,B,P,P,P,B | D             | 2.89E-09   | 6.51       | 1.44       | 8.16 |
| 0.0011          | T,T,T,T,T,T,T,I,P,B,B,B,B,B | N             | 2.89E-09   | 6.51       | 1.44       | 8.16 |
| 0.0011          | T,T,T,T,T,T,T,I,P,B,B,B,B,B | N             | 2.89E-09   | 6.51       | 1.44       | 8.16 |
| 0.0001          | T,T,T,T,T,T,T,I,B,B,B,B,B,B | D             | 2.89E-09   | 6.51       | 1.44       | 8.16 |
| 0.0002          | D,D,D,D,D,D,I,B,B,D,B,D,D   | D             | 2.89E-09   | 6.51       | 1.44       | 8.16 |
| 6.037e-05       | D,D,D,D,D,D,I,D,D,D,D,D,D   | D             | 2.89E-09   | 6.51       | 1.44       | 8.16 |
| 1.511e-05       | T,T,T,T,T,T,T,I,B,B,B,B,B,B | D             | 2.89E-09   | 6.51       | 1.44       | 8.16 |
| 1.511e-05       | T,T,T,T,T,T,T,I,B,B,B,B,B,B | D             | 2.89E-09   | 6.51       | 1.44       | 8.16 |
| NA              | T,T,T,T,T,T,T,I,P,B,P,B,B,B | D             | 2.89E-09   | 6.51       | 1.44       | 8.16 |
| 0.0040          | T,T,T,T,T,D,D,D,P,D,P,P,P   | D             | 2.89E-09   | 6.51       | 1.44       | 8.16 |
| 0.0040          | T,T,T,T,T,D,D,D,P,D,P,P,P   | D             | 2.89E-09   | 6.51       | 1.44       | 8.16 |
| 0.0040          | T,T,T,T,T,D,D,D,P,D,P,P,P   | D             | 2.89E-09   | 6.51       | 1.44       | 8.16 |
| 0.0040          | T,T,T,T,T,D,D,D,P,D,P,P,P   | D             | 2.89E-09   | 6.51       | 1.44       | 8.16 |
| 0.0040          | T,T,T,T,T,D,D,D,P,D,P,P,P   | D             | 2.89E-09   | 6.51       | 1.44       | 8.16 |
| 0.0040          | T,T,T,T,T,D,D,D,P,D,P,P,P   | D             | 2.89E-09   | 6.51       | 1.44       | 8.16 |
| 0.0040          | T,T,T,T,T,D,D,D,P,D,P,P,P   | D             | 2.89E-09   | 6.51       | 1.44       | 8.16 |
| 0.0040          | T,T,T,T,T,D,D,D,P,D,P,P,P   | D             | 2.89E-09   | 6.51       | 1.44       | 8.16 |
| 0.0040          | T,T,T,T,T,D,D,D,P,D,P,P,P   | D             | 2.89E-09   | 6.51       | 1.44       | 8.16 |
| 0.0040          | T,T,T,T,T,D,D,D,P,D,P,P,P   | D             | 2.89E-09   | 6.51       | 1.44       | 8.16 |
| 0.0040          | T,T,T,T,T,D,D,D,P,D,P,P,P   | D             | 2.89E-09   | 6.51       | 1.44       | 8.16 |
| 0.0040          | T,T,T,T,T,D,D,D,P,D,P,P,P   | D             | 2.89E-09   | 6.51       | 1.44       | 8.16 |
| 0.0040          | T,T,T,T,T,D,D,D,P,D,P,P,P   | D             | 2.89E-09   | 6.51       | 1.44       | 8.16 |
| 0.0006          | T,T,T,T,T,T B,B,P,B,B       | N             | 2.89E-09   | 6.51       | 1.44       | 8.16 |
| 0.0006          | T,T,T,T,T,T B,B,P,B,B       | N             | 2.89E-09   | 6.51       | 1.44       | 8.16 |
| 0.0006          | T,T,T,T,T,T B,B,P,B,B       | N             | 2.89E-09   | 6.51       | 1.44       | 8.16 |
| 9.643e-05       | T,T,T,T,T,D B,B,B,B,B       | N             | 2.89E-09   | 6.51       | 1.44       | 8.16 |
| 0.0006          | D,D,D,D,D,D P,P,P,P,P       | N             | 2.89E-09   | 6.51       | 1.44       | 8.16 |
| 8.996e-05       |                             | A             | 2.89E-09   | 6.51       | 1.44       | 8.16 |
| NA              | D,D,D,D,D D,D,D,D,D         | D             | 2.89E-09   | 6.51       | 1.44       | 8.16 |



| Sample      | Status | Chr | Position   | ID          | Ref | Alt | Type |
|-------------|--------|-----|------------|-------------|-----|-----|------|
| PMD-OUI-08: |        | 1   | 1 44804955 | chr1_448049 | T   | C   | MD   |
| PMD-SOU-07  |        | 1   | 1 44820629 | chr1_448206 | G   | A   | SD   |
| PMD-NOT-09  |        | 1   | 1 44820667 | chr1_448206 | C   | G   | SD   |

| Gene | BaseChange | AChange    | Transcript  | OtherTranscr | MAF       | MAFControls | MAFCases |
|------|------------|------------|-------------|--------------|-----------|-------------|----------|
| ERI3 | c.251A>G   | p.Gln84Arg | NM_024066.2 | MD:NM_001:   | 0.0004417 | 0           | 0.005435 |
| ERI3 | c.70C>T    | p.Pro24Ser | NM_024066.2 |              | 0.0004371 | 0           | 0.005435 |
| ERI3 | c.32G>C    | p.Gly11Ala | NM_024066.2 |              | 0.0004371 | 0           | 0.005435 |





| ExAC_maxPO | SIFT    | Polyphen2_H | Mutation_tasp | LI score   | gTEX_Mean_ | gTEX_mean_ | gTEX_mean_ |
|------------|---------|-------------|---------------|------------|------------|------------|------------|
| NA         | D,D     | B,B,B       | D             | 0.12975609 | 17.74      | 25.28      | 15.29      |
| 0.0010     | D,T,T,D | P,P         | D             | 0.12975609 | 17.74      | 25.28      | 15.29      |
| NA         | D,D,T,D | D,D         | D             | 0.12975609 | 17.74      | 25.28      | 15.29      |

gTEX\_Diff\_Exp\_brain/other

1.653

1.653

1.653

| Sample      | Status | Chr | Position    | ID          | Ref | Alt | Type |
|-------------|--------|-----|-------------|-------------|-----|-----|------|
| PMis2-SOU-0 |        | 1   | 1 113264968 | chr1_113264 | C   | T   | Mis2 |
| 20469       |        | 0   | 1 113264968 | chr1_113264 | C   | T   | Mis2 |
| PMis2-LEG-0 |        | 1   | 1 113264968 | chr1_113264 | C   | T   | Mis2 |
| B00FWWI     |        | 0   | 1 113264968 | chr1_113264 | C   | T   | Mis2 |
| 21159       |        | 0   | 1 113266594 | chr1_113266 | G   | A   | Mis1 |
| PMis2-LOG-0 |        | 1   | 1 113266594 | chr1_113266 | G   | A   | Mis1 |
| PMis2-FLA-0 |        | 1   | 1 113266636 | chr1_113266 | C   | T   | Mis2 |
| B00G72W     |        | 0   | 1 113266716 | chr1_113266 | C   | T   | Mis3 |
| PMis2-BOR-0 |        | 1   | 1 113269294 | chr1_113269 | C   | T   | Mis1 |

| Gene    | BaseChange | AChange     | Transcript     | OtherTranscr | MAF       | MAFControls | MAFCases |
|---------|------------|-------------|----------------|--------------|-----------|-------------|----------|
| FAM19A3 | c.113C>T   | p.Thr38Ile  | NM_0010044     | Mis2:NM_18:  | 0.001748  | 0.0009515   | 0.01087  |
| FAM19A3 | c.113C>T   | p.Thr38Ile  | NM_0010044     | Mis2:NM_18:  | 0.001748  | 0.0009515   | 0.01087  |
| FAM19A3 | c.113C>T   | p.Thr38Ile  | NM_0010044     | Mis2:NM_18:  | 0.001748  | 0.0009515   | 0.01087  |
| FAM19A3 | c.113C>T   | p.Thr38Ile  | NM_0010044     | Mis2:NM_18:  | 0.001748  | 0.0009515   | 0.01087  |
| FAM19A3 | c.293G>A   | p.Arg98His  | NM_001004440.1 |              | 0.0008757 | 0.0004766   | 0.005435 |
| FAM19A3 | c.293G>A   | p.Arg98His  | NM_001004440.1 |              | 0.0008757 | 0.0004766   | 0.005435 |
| FAM19A3 | c.335C>T   | p.Pro112Leu | NM_0010044     | SYNONYMOU    | 0.0004371 | 0           | 0.005435 |
| FAM19A3 | c.415C>T   | p.Arg139Trp | NM_0010044     | Mis3:NM_18:  | 0.0004425 | 0.0004822   | 0        |
| FAM19A3 | c.502C>T   | p.Leu168Phe | NM_001004440.1 |              | 0.0004371 | 0           | 0.005435 |

| ExAC_ALL_AF | ExAC_NFE_AI | ExAC_SAS_AF | ExAC_AMR_* | ExAC_AFR_AF | ExAC_EAS_AF | ExAC_OTH_A | ExAC_FIN_AF |   |
|-------------|-------------|-------------|------------|-------------|-------------|------------|-------------|---|
| 0.0016      | 0.0004      |             | 0 0.0003   | 0.0165      |             | 0 0.0022   | 0           |   |
| 0.0016      | 0.0004      |             | 0 0.0003   | 0.0165      |             | 0 0.0022   | 0           |   |
| 0.0016      | 0.0004      |             | 0 0.0003   | 0.0165      |             | 0 0.0022   | 0           |   |
| 0.0016      | 0.0004      |             | 0 0.0003   | 0.0165      |             | 0 0.0022   | 0           |   |
| 0.0014      | 0.0023      | 0.0001      | 0.0005     | 0.0009      |             | 0          | 0 0.0002    |   |
| 0.0014      | 0.0023      | 0.0001      | 0.0005     | 0.0009      |             | 0          | 0 0.0002    |   |
| NA          | NA          | NA          | NA         | NA          | NA          | NA         | NA          |   |
| 0.0002      | 0.0002      |             | 0 9.24e-05 | 0.0004      | 0.0001      |            | 0           | 0 |
| 0.0014      | 0.0012      |             | 0          | 0           | 0           | 0 0.0022   | 0.0125      |   |

| ExAC_maxPO | SIFT | Polyphen2_H | Mutation_tas | pLI score  | gTEX_Mean_ | gTEX_mean_ | gTEX_mean_ |
|------------|------|-------------|--------------|------------|------------|------------|------------|
| 0.0165     | T,T  | B,P         | D            | 0.02714738 | 0.3        | 0.55       | 0.22       |
| 0.0165     | T,T  | B,P         | D            | 0.02714738 | 0.3        | 0.55       | 0.22       |
| 0.0165     | T,T  | B,P         | D            | 0.02714738 | 0.3        | 0.55       | 0.22       |
| 0.0165     | T,T  | B,P         | D            | 0.02714738 | 0.3        | 0.55       | 0.22       |
| 0.0023     | D    | B           | N            | 0.02714738 | 0.3        | 0.55       | 0.22       |
| 0.0023     | D    | B           | N            | 0.02714738 | 0.3        | 0.55       | 0.22       |
| NA         | D    | B           | D            | 0.02714738 | 0.3        | 0.55       | 0.22       |
| 0.0004     | D,D  | D,D         | D,D          | 0.02714738 | 0.3        | 0.55       | 0.22       |
| 0.0125     | D    | B           | N            | 0.02714738 | 0.3        | 0.55       | 0.22       |

gTEX\_Diff\_Exp\_brain/other

2.445

2.445

2.445

2.445

2.445

2.445

2.445

2.445

2.445



| Sample       | Status | Chr | Position   | ID          | Ref | Alt | Type |
|--------------|--------|-----|------------|-------------|-----|-----|------|
| PMis2-LEN-09 |        | 1   | 2 85360919 | chr2_853609 | C   | A   | Mis1 |
| PMis2-BON-0  |        | 1   | 2 85360997 | chr2_853609 | G   | C   | Mis3 |
| PMis2-VIL-08 |        | 1   | 2 85361512 | chr2_853615 | TC  | T   | PTV  |
| 21930        |        | 0   | 2 85531044 | chr2_855310 | G   | A   | Mis3 |
| 21783        |        | 0   | 2 85531044 | chr2_855310 | G   | A   | Mis3 |
| B00G74P      |        | 0   | 2 85532411 | chr2_855324 | A   | G   | Mis2 |
| PMis2-DRO-0  |        | 1   | 2 85536202 | chr2_855362 | G   | A   | Mis3 |
| PMis2-BOU-0  |        | 1   | 2 85536322 | chr2_855363 | C   | T   | Mis3 |
| ROU-LEB-171  |        | 0   | 2 85536508 | chr2_855365 | G   | A   | Mis1 |

| Gene   | BaseChange | AChange     | Transcript  | OtherTranscr | MAF       | MAFControls | MAFCases |
|--------|------------|-------------|-------------|--------------|-----------|-------------|----------|
| TCF7L1 | c.112C>A   | p.Leu38Met  | NM_031283.2 |              | 0.0004371 | 0           | 0.005435 |
| TCF7L1 | c.190G>C   | p.Glu64Gln  | NM_031283.2 |              | 0.0004374 | 0           | 0.005435 |
| TCF7L1 | c.383delC  | p.Pro128fs  | NM_031283.2 |              | 0.0004371 | 0           | 0.005435 |
| TCF7L1 | c.685G>A   | p.Glu229Lys | NM_031283.2 |              | 0.0008741 | 0.0009515   | 0        |
| TCF7L1 | c.685G>A   | p.Glu229Lys | NM_031283.2 |              | 0.0008741 | 0.0009515   | 0        |
| TCF7L1 | c.874A>G   | p.Met292Val | NM_031283.2 |              | 0.0004371 | 0.0004757   | 0        |
| TCF7L1 | c.1384G>A  | p.Glu462Lys | NM_031283.2 |              | 0.0004371 | 0           | 0.005435 |
| TCF7L1 | c.1504C>T  | p.Pro502Ser | NM_031283.2 |              | 0.0004371 | 0           | 0.005435 |
| TCF7L1 | c.1690G>A  | p.Ala564Thr | NM_031283.2 |              | 0.0004371 | 0.0004757   | 0        |

| ExAC_ALL_AF | ExAC_NFE_AI | ExAC_SAS_AF | ExAC_AMR_A | ExAC_AFR_AF | ExAC_EAS_AF | ExAC_OTH_A | ExAC_FIN_AF |
|-------------|-------------|-------------|------------|-------------|-------------|------------|-------------|
| 0.0005      | 0.0011      |             | 0          | 0           | 0           | 0          | 0           |
| NA          | NA          | NA          | NA         | NA          | NA          | NA         | NA          |
| NA          | NA          | NA          | NA         | NA          | NA          | NA         | NA          |
| NA          | NA          | NA          | NA         | NA          | NA          | NA         | NA          |
| NA          | NA          | NA          | NA         | NA          | NA          | NA         | NA          |
| 6.601e-05   | 0.0001      |             | 0          | 8.642e-05   |             | 0          | 0           |
| 1.67e-05    |             | 0           | 0          | 0           |             | 0          | 0           |
| 1.653e-05   | 1.505e-05   |             | 0          | 8.652e-05   |             | 0          | 0           |
| 0.0002      | 1.619e-05   | 8.256e-05   | 0.0003     | 0.0018      |             | 0          | 0.0013      |

| ExAC_maxPO SIFT |   | Polyphen2_H Mutation_taspLI score |   | gTEX_Mean_ | gTEX_mean_ | gTEX_mean_ |       |
|-----------------|---|-----------------------------------|---|------------|------------|------------|-------|
| 0.0011          | T | B                                 | D | 0.75375201 | 8.14       | 2.08       | 10.11 |
| NA              | D | D                                 | D | 0.75375201 | 8.14       | 2.08       | 10.11 |
| NA              |   |                                   |   | 0.75375201 | 8.14       | 2.08       | 10.11 |
| NA              | D | D                                 | D | 0.75375201 | 8.14       | 2.08       | 10.11 |
| NA              | D | D                                 | D | 0.75375201 | 8.14       | 2.08       | 10.11 |
| 0.0001          | D | B                                 | D | 0.75375201 | 8.14       | 2.08       | 10.11 |
| 0.0003          | D | P                                 | D | 0.75375201 | 8.14       | 2.08       | 10.11 |
| 8.652e-05       | D | P                                 | D | 0.75375201 | 8.14       | 2.08       | 10.11 |
| 0.0018          | T | B                                 | D | 0.75375201 | 8.14       | 2.08       | 10.11 |

gTEX\_Diff\_Exp\_brain/other

0.206

0.206

0.206

0.206

0.206

0.206

0.206

0.206

0.206

| Sample       | Status | Chr | Position | ID        | Ref         | Alt | Type |      |
|--------------|--------|-----|----------|-----------|-------------|-----|------|------|
| 21101        |        | 0   | 3        | 112969725 | chr3_112969 | C   | A    | Mis1 |
| 22172        |        | 0   | 3        | 112987262 | chr3_112987 | G   | A    | Mis3 |
| B00GG64      |        | 0   | 3        | 112987271 | chr3_112987 | G   | A    | Mis2 |
| B00FWWL      |        | 0   | 3        | 112991434 | chr3_112991 | G   | A    | Mis2 |
| PMis2-LEG-07 |        | 1   | 3        | 112991493 | chr3_112991 | G   | A    | Mis1 |
| 22344        |        | 0   | 3        | 112991493 | chr3_112991 | G   | A    | Mis1 |
| 21024        |        | 0   | 3        | 112991493 | chr3_112991 | G   | A    | Mis1 |
| PMis2-BAT-01 |        | 1   | 3        | 112991493 | chr3_112991 | G   | A    | Mis1 |
| B00G73S      |        | 0   | 3        | 112991493 | chr3_112991 | G   | A    | Mis1 |
| B00G7LM      |        | 0   | 3        | 112991493 | chr3_112991 | G   | A    | Mis1 |
| B00G750      |        | 0   | 3        | 112991493 | chr3_112991 | G   | A    | Mis1 |
| PMis2-DAN-01 |        | 1   | 3        | 112991514 | chr3_112991 | G   | A    | Mis2 |
| B00GG8E      |        | 0   | 3        | 112991918 | chr3_112991 | C   | T    | Mis3 |
| PMis2-SOU-01 |        | 1   | 3        | 112991985 | chr3_112991 | G   | A    | Mis3 |
| PMis2-LEG-07 |        | 1   | 3        | 112991985 | chr3_112991 | G   | A    | Mis3 |
| 20214        |        | 0   | 3        | 112991985 | chr3_112991 | G   | A    | Mis3 |
| PMis2-LAF-07 |        | 1   | 3        | 112991985 | chr3_112991 | G   | A    | Mis3 |
| 23064        |        | 0   | 3        | 112991994 | chr3_112991 | G   | A    | Mis1 |
| 22462        |        | 0   | 3        | 112992062 | chr3_112992 | C   | T    | Mis3 |
| 21490        |        | 0   | 3        | 112992072 | chr3_112992 | G   | A    | Mis1 |
| 23357        |        | 0   | 3        | 112992072 | chr3_112992 | G   | A    | Mis1 |
| B00FWX9      |        | 0   | 3        | 112992140 | chr3_112992 | G   | C    | Mis1 |
| B00GG6E      |        | 0   | 3        | 112992140 | chr3_112992 | G   | C    | Mis1 |
| PMis2-DEV-01 |        | 1   | 3        | 112992140 | chr3_112992 | G   | C    | Mis1 |
| 22319        |        | 0   | 3        | 112993492 | chr3_112993 | G   | A    | Mis1 |
| 22357        |        | 0   | 3        | 112993501 | chr3_112993 | T   | C    | Mis3 |
| B00FWYX      |        | 0   | 3        | 112997066 | chr3_112997 | C   | T    | Mis2 |
| PMis2-DES-01 |        | 1   | 3        | 112998721 | chr3_112998 | G   | A    | Mis2 |
| 20625        |        | 0   | 3        | 112999432 | chr3_112999 | C   | T    | Mis3 |
| B00G7KK      |        | 0   | 3        | 112999880 | chr3_112999 | G   | T    | Mis3 |
| B00G7L6      |        | 0   | 3        | 112999967 | chr3_112999 | G   | A    | Mis3 |
| 22260        |        | 0   | 3        | 113002396 | chr3_113002 | T   | C    | Mis3 |
| 21101        |        | 0   | 3        | 113002475 | chr3_113002 | G   | C    | Mis2 |
| PMis2-JOU-01 |        | 1   | 3        | 113003226 | chr3_113003 | T   | C    | Mis2 |
| PMis2-COU-01 |        | 1   | 3        | 113003310 | chr3_113003 | C   | T    | Mis2 |
| B00G7KT      |        | 0   | 3        | 113003311 | chr3_113003 | G   | A    | Mis1 |
| 22813        |        | 0   | 3        | 113003639 | chr3_113003 | C   | T    | Mis1 |

| Gene | BaseChange | AAChange    | Transcript     | OtherTranscr | MAF       | MAFControls | MAFCases |
|------|------------|-------------|----------------|--------------|-----------|-------------|----------|
| BOC  | c.421C>A   | p.His141Asn | NM_001301867.1 |              | 0.0004371 | 0.0004757   | 0        |
| BOC  | c.493G>A   | p.Val165Ile | NM_001301867.1 | Mis3:NM_03:  | 0.0004371 | 0.0004757   | 0        |
| BOC  | c.502G>A   | p.Glu168Lys | NM_001301867.1 | Mis2:NM_03:  | 0.0004371 | 0.0004757   | 0        |
| BOC  | c.845G>A   | p.Ser282Asn | NM_001301867.1 | Mis2:NM_03:  | 0.0004371 | 0.0004757   | 0        |
| BOC  | c.904G>A   | p.Asp302Asn | NM_001301867.1 | Mis1:NM_03:  | 0.003059  | 0.002379    | 0.01087  |
| BOC  | c.904G>A   | p.Asp302Asn | NM_001301867.1 | Mis1:NM_03:  | 0.003059  | 0.002379    | 0.01087  |
| BOC  | c.904G>A   | p.Asp302Asn | NM_001301867.1 | Mis1:NM_03:  | 0.003059  | 0.002379    | 0.01087  |
| BOC  | c.904G>A   | p.Asp302Asn | NM_001301867.1 | Mis1:NM_03:  | 0.003059  | 0.002379    | 0.01087  |
| BOC  | c.904G>A   | p.Asp302Asn | NM_001301867.1 | Mis1:NM_03:  | 0.003059  | 0.002379    | 0.01087  |
| BOC  | c.904G>A   | p.Asp302Asn | NM_001301867.1 | Mis1:NM_03:  | 0.003059  | 0.002379    | 0.01087  |
| BOC  | c.925G>A   | p.Gly309Arg | NM_001301867.1 | Mis2:NM_03:  | 0.0004371 | 0           | 0.005435 |
| BOC  | c.964C>T   | p.Pro322Ser | NM_001301867.1 | Mis3:NM_03:  | 0.0004374 | 0.0004762   | 0        |
| BOC  | c.1031G>A  | p.Cys344Tyr | NM_001301867.1 | Mis3:NM_03:  | 0.001748  | 0.0004757   | 0.0163   |
| BOC  | c.1031G>A  | p.Cys344Tyr | NM_001301867.1 | Mis3:NM_03:  | 0.001748  | 0.0004757   | 0.0163   |
| BOC  | c.1031G>A  | p.Cys344Tyr | NM_001301867.1 | Mis3:NM_03:  | 0.001748  | 0.0004757   | 0.0163   |
| BOC  | c.1031G>A  | p.Cys344Tyr | NM_001301867.1 | Mis3:NM_03:  | 0.001748  | 0.0004757   | 0.0163   |
| BOC  | c.1040G>A  | p.Arg347His | NM_001301867.1 | Mis1:NM_03:  | 0.0004371 | 0.0004757   | 0        |
| BOC  | c.1108C>T  | p.Arg370Trp | NM_001301867.1 | Mis3:NM_03:  | 0.0004371 | 0.0004757   | 0        |
| BOC  | c.1118G>A  | p.Arg373His | NM_001301867.1 | Mis1:NM_03:  | 0.0008741 | 0.0009515   | 0        |
| BOC  | c.1118G>A  | p.Arg373His | NM_001301867.1 | Mis1:NM_03:  | 0.0008741 | 0.0009515   | 0        |
| BOC  | c.1186G>C  | p.Glu396Gln | NM_001301867.1 | Mis1:NM_03:  | 0.001311  | 0.0009515   | 0.005435 |
| BOC  | c.1186G>C  | p.Glu396Gln | NM_001301867.1 | Mis1:NM_03:  | 0.001311  | 0.0009515   | 0.005435 |
| BOC  | c.1186G>C  | p.Glu396Gln | NM_001301867.1 | Mis1:NM_03:  | 0.001311  | 0.0009515   | 0.005435 |
| BOC  | c.1505G>A  | p.Arg502Gln | NM_001301867.1 | Mis1:NM_03:  | 0.0004382 | 0.0004766   | 0        |
| BOC  | c.1514T>C  | p.Ile505Thr | NM_001301867.1 | Mis3:NM_03:  | 0.0004386 | 0.0004771   | 0        |
| BOC  | c.1667C>T  | p.Ala556Val | NM_001301867.1 | Mis2:NM_03:  | 0.0004371 | 0.0004757   | 0        |
| BOC  | c.2074G>A  | p.Glu692Lys | NM_001301867.1 | Mis2:NM_03:  | 0.0004371 | 0           | 0.005435 |
| BOC  | c.2233C>T  | p.Pro745Ser | NM_001301867.1 | Mis3:NM_03:  | 0.0004371 | 0.0004757   | 0        |
| BOC  | c.2314G>T  | p.Asp772Tyr | NM_001301867.1 | Mis3:NM_03:  | 0.0004371 | 0.0004757   | 0        |
| BOC  | c.2401G>A  | p.Glu801Lys | NM_001301867.1 | Mis3:NM_03:  | 0.0004371 | 0.0004757   | 0        |
| BOC  | c.2573T>C  | p.Ile858Thr | NM_001301867.1 | Mis3:NM_03:  | 0.0004371 | 0.0004757   | 0        |
| BOC  | c.2652G>C  | p.Lys884Asn | NM_001301867.1 | Mis2:NM_03:  | 0.0004371 | 0.0004757   | 0        |
| BOC  | c.2701T>C  | p.Ser901Pro | NM_001301867.1 | Mis2:NM_03:  | 0.0004371 | 0           | 0.005435 |
| BOC  | c.2785C>T  | p.Arg929Trp | NM_001301867.1 | Mis2:NM_03:  | 0.0004371 | 0           | 0.005435 |
| BOC  | c.2786G>A  | p.Arg929Gln | NM_001301867.1 | Mis1:NM_03:  | 0.0004371 | 0.0004757   | 0        |
| BOC  | c.2900C>T  | p.Thr967Ile | NM_001301867.1 | Mis1:NM_03:  | 0.0004371 | 0.0004757   | 0        |





| ExAC_maxPO | SIFT    | Polyphen2_H | Mutation_tas | pLI score  | gTEX_Mean | gTEX_mean | gTEX_mean |
|------------|---------|-------------|--------------|------------|-----------|-----------|-----------|
| 0.1318     | D,D     | B           | N            | 0.00472749 | 7.06      | 1.41      | 8.89      |
| 0.0010     | T,D,T,T | P,P         | D            | 0.00472749 | 7.06      | 1.41      | 8.89      |
| NA         | T,D,T,T | B,B         | D            | 0.00472749 | 7.06      | 1.41      | 8.89      |
| 0.0011     | T,T,T   | P,P         | D            | 0.00472749 | 7.06      | 1.41      | 8.89      |
| 0.0011     | T,T,T   | B,B         | D            | 0.00472749 | 7.06      | 1.41      | 8.89      |
| 0.0011     | T,T,T   | B,B         | D            | 0.00472749 | 7.06      | 1.41      | 8.89      |
| 0.0011     | T,T,T   | B,B         | D            | 0.00472749 | 7.06      | 1.41      | 8.89      |
| 0.0011     | T,T,T   | B,B         | D            | 0.00472749 | 7.06      | 1.41      | 8.89      |
| 0.0011     | T,T,T   | B,B         | D            | 0.00472749 | 7.06      | 1.41      | 8.89      |
| 0.0011     | T,T,T   | B,B         | D            | 0.00472749 | 7.06      | 1.41      | 8.89      |
| 0.0011     | T,T,T   | B,B         | D            | 0.00472749 | 7.06      | 1.41      | 8.89      |
| 0.0039     | T,T,T   | D,D         | D            | 0.00472749 | 7.06      | 1.41      | 8.89      |
| NA         | D,D,D   | P,P         | D            | 0.00472749 | 7.06      | 1.41      | 8.89      |
| 0.0011     | D,D,D   | D,D         | D            | 0.00472749 | 7.06      | 1.41      | 8.89      |
| 0.0011     | D,D,D   | D,D         | D            | 0.00472749 | 7.06      | 1.41      | 8.89      |
| 0.0011     | D,D,D   | D,D         | D            | 0.00472749 | 7.06      | 1.41      | 8.89      |
| 0.0011     | D,D,D   | D,D         | D            | 0.00472749 | 7.06      | 1.41      | 8.89      |
| NA         | T,T,T   | B,B         | D            | 0.00472749 | 7.06      | 1.41      | 8.89      |
| 8.754e-05  | D,D,D   | D,D         | D            | 0.00472749 | 7.06      | 1.41      | 8.89      |
| 0.0001     | T,T,T   | B,B         | D            | 0.00472749 | 7.06      | 1.41      | 8.89      |
| 0.0001     | T,T,T   | B,B         | D            | 0.00472749 | 7.06      | 1.41      | 8.89      |
| 0.0007     | T,T,T   | B,B         | D            | 0.00472749 | 7.06      | 1.41      | 8.89      |
| 0.0007     | T,T,T   | B,B         | D            | 0.00472749 | 7.06      | 1.41      | 8.89      |
| 0.0007     | T,T,T   | B,B         | D            | 0.00472749 | 7.06      | 1.41      | 8.89      |
| 0.0001     | T,T,T   | B,B         | D            | 0.00472749 | 7.06      | 1.41      | 8.89      |
| NA         | D,D,D   | P,P         | D            | 0.00472749 | 7.06      | 1.41      | 8.89      |
| 2.998e-05  | T,T,T   | D,D         | D            | 0.00472749 | 7.06      | 1.41      | 8.89      |
| 0.0003     | T,T,T   | P,P,B       | D            | 0.00472749 | 7.06      | 1.41      | 8.89      |
| NA         | D,D,D   | D,D,D       | D            | 0.00472749 | 7.06      | 1.41      | 8.89      |
| NA         | D,D,D   | D,D,D       | D            | 0.00472749 | 7.06      | 1.41      | 8.89      |
| 1.499e-05  | D,D,D   | D,D,D       | D            | 0.00472749 | 7.06      | 1.41      | 8.89      |
| NA         | D,D,D   | D,P,P       | D            | 0.00472749 | 7.06      | 1.41      | 8.89      |
| 0.1046     | T,T,T   | D,D,D       | D            | 0.00472749 | 7.06      | 1.41      | 8.89      |
| NA         | D,D,D   | B,B,B       | D            | 0.00472749 | 7.06      | 1.41      | 8.89      |
| 4.5e-05    | T,T,T   | D,D,D       | D            | 0.00472749 | 7.06      | 1.41      | 8.89      |
| NA         | T,T,T   | B,B,B       | D            | 0.00472749 | 7.06      | 1.41      | 8.89      |
| NA         | .,D,D,D | .,B,B,B     | N,N          | 0.00472749 | 7.06      | 1.41      | 8.89      |

gTEX\_Diff\_Exp\_brain/other

0.159

0.159

0.159

0.159

0.159

0.159

0.159

0.159

0.159

0.159

0.159

0.159

0.159

0.159

0.159

0.159

0.159

0.159

0.159

0.159

0.159

0.159

0.159

0.159

0.159

0.159

0.159

0.159

0.159

0.159

0.159

0.159

0.159

0.159

0.159

0.159

0.159

0.159

| Sample      | Status | Chr | Position    | ID          | Ref | Alt | Type |
|-------------|--------|-----|-------------|-------------|-----|-----|------|
| PMD-BOH-08  |        | 1   | 3 132047117 | chr3_132047 | C   | T   | SD   |
| 20662       |        | 0   | 3 132050522 | chr3_132050 | A   | G   | MD   |
| B00GWBA     |        | 0   | 3 132050528 | chr3_132050 | T   | C   | BD   |
| PMD-DUC-08  |        | 1   | 3 132056298 | chr3_132056 | A   | G   | LOF  |
| PMD-FLA-082 |        | 1   | 3 132075555 | chr3_132075 | C   | T   | SD   |

| Gene | BaseChange | AChange     | Transcript | OtherTranscr | MAF       | MAFControls | MAFCases |
|------|------------|-------------|------------|--------------|-----------|-------------|----------|
| ACPP | c.127C>T   | p.Arg43Trp  | NM_0011341 | SD:NM_0010   | 0.0004371 | 0           | 0.005435 |
| ACPP | c.248A>G   | p.Glu83Gly  | NM_0011341 | MD:NM_0010   | 0.0004421 | 0.0004817   | 0        |
| ACPP | c.254T>C   | p.Ile85Thr  | NM_0011341 | BD:NM_0010   | 0.0004421 | 0.0004817   | 0        |
| ACPP | c.457-2A>G |             | NM_0011341 | LOF:NM_0010  | 0.0004371 | 0           | 0.005435 |
| ACPP | c.994C>T   | p.Arg332Trp | NM_0011341 | SD:NM_0010   | 0.0004371 | 0           | 0.005435 |

| ExAC_ALL_AF | ExAC_NFE_AI | ExAC_SAS_AF | ExAC_AMR_* | ExAC_AFR_AI | ExAC_EAS_AF | ExAC_OTH_A | ExAC_FIN_AF |
|-------------|-------------|-------------|------------|-------------|-------------|------------|-------------|
| 8.271e-06   | 0           | 0           | 8.672e-05  | 0           | 0           | 0          | 0           |
| 0.0001      | 0.0001      | 0.0002      | 0.0002     | 0           | 0           | 0.0011     | 0           |
| 3.328e-05   | 6.038e-05   | 0           | 0          | 0           | 0           | 0          | 0           |
| 8.266e-06   | 1.502e-05   | 0           | 0          | 0           | 0           | 0          | 0           |
| 8.238e-06   | 1.499e-05   | 0           | 0          | 0           | 0           | 0          | 0           |

| ExAC_maxPO SIFT |         | Polyphen2_H Mutation_taspLI score |   | gTEX_Mean_ | gTEX_mean_ | gTEX_mean_ |       |
|-----------------|---------|-----------------------------------|---|------------|------------|------------|-------|
| 8.672e-05       | D,D,D,D | D,D,D                             | D | 1.76E-07   | 12.05      | 0.05       | 15.95 |
| 0.0011          | D,D,D   | P,P,P                             | N | 1.76E-07   | 12.05      | 0.05       | 15.95 |
| 6.038e-05       | D,D,T   | B,B,B                             | N | 1.76E-07   | 12.05      | 0.05       | 15.95 |
| 1.502e-05       |         |                                   | D | 1.76E-07   | 12.05      | 0.05       | 15.95 |
| 1.499e-05       | D,D,D   | D,D,D                             | D | 1.76E-07   | 12.05      | 0.05       | 15.95 |

gTEX\_Diff\_Exp\_brain/other

0.003

0.003

0.003

0.003

0.003

| Sample       | Status | Chr | Position   | ID          | Ref | Alt | Type |
|--------------|--------|-----|------------|-------------|-----|-----|------|
| 22167        |        | 0   | 5 41313783 | chr5_413137 | C   | T   | Mis2 |
| B00GG5P      |        | 0   | 5 41313840 | chr5_413138 | G   | A   | Mis2 |
| PMis2-DEI-08 |        | 1   | 5 41313844 | chr5_413138 | G   | A   | Mis3 |
| PMis2-FAL-08 |        | 1   | 5 41382576 | chr5_413825 | G   | C   | Mis3 |
| PMis2-DAN-0  |        | 1   | 5 41382576 | chr5_413825 | G   | C   | Mis3 |



| Gene   | BaseChange | AChange     | Transcript     | OtherTranscr | MAF       | MAFControls | MAFCases |
|--------|------------|-------------|----------------|--------------|-----------|-------------|----------|
| PLCXD3 | c.902G>A   | p.Gly301Asp | NM_001005473.2 |              | 0.0004371 | 0.0004757   | 0        |
| PLCXD3 | c.845C>T   | p.Thr282Met | NM_001005473.2 |              | 0.0004371 | 0.0004757   | 0        |
| PLCXD3 | c.841C>T   | p.Arg281Cys | NM_001005473.2 |              | 0.0004371 | 0           | 0.005435 |
| PLCXD3 | c.164C>G   | p.Pro55Arg  | NM_001005473.2 |              | 0.0008741 | 0           | 0.01087  |
| PLCXD3 | c.164C>G   | p.Pro55Arg  | NM_001005473.2 |              | 0.0008741 | 0           | 0.01087  |

| ExAC_ALL_AF | ExAC_NFE_AI | ExAC_SAS_AF | ExAC_AMR_A | ExAC_AFR_AI | ExAC_EAS_AF | ExAC_OTH_A | ExAC_FIN_AF |
|-------------|-------------|-------------|------------|-------------|-------------|------------|-------------|
| 0.0001      | 0.0001      | 0           | 0          | 0.0004      | 0           | 0.0011     | 0           |
| 0.0002      | 0.0003      | 0           | 0          | 0           | 0.0001      | 0          | 0           |
| 2.551e-05   | 0           | 0.0001      | 0          | 0           | 0.0001      | 0          | 0           |
| 5.941e-05   | 1.538e-05   | 0.0003      | 0          | 0           | 0           | 0.0011     | 0           |
| 5.941e-05   | 1.538e-05   | 0.0003      | 0          | 0           | 0           | 0.0011     | 0           |

| ExAC_maxPO | SIFT | Polyphen2_H | Mutation_tasp | LI score   | gTEX_Mean_ | gTEX_mean_ | gTEX_mean_ |
|------------|------|-------------|---------------|------------|------------|------------|------------|
| 0.0011     | T,T  | D           | D             | 0.04848874 | 2.75       | 4.08       | 2.32       |
| 0.0003     | T,T  | D           | D             | 0.04848874 | 2.75       | 4.08       | 2.32       |
| 0.0001     | D,D  | D           | D             | 0.04848874 | 2.75       | 4.08       | 2.32       |
| 0.0011     | D,D  | D           | D             | 0.04848874 | 2.75       | 4.08       | 2.32       |
| 0.0011     | D,D  | D           | D             | 0.04848874 | 2.75       | 4.08       | 2.32       |

gTEX\_Diff\_Exp\_brain/other

1.759

1.759

1.759

1.759

1.759

| Sample      | Status | Chr | Position   | ID          | Ref | Alt | Type |
|-------------|--------|-----|------------|-------------|-----|-----|------|
| PMD-NOT-09  |        | 1   | 5 60241171 | chr5_602411 | A   | G   | Mis3 |
| B00GG7S     |        | 0   | 5 60448573 | chr5_604485 | A   | G   | Mis3 |
| PMD-OUI-08: |        | 1   | 5 60448723 | chr5_604487 | G   | A   | Mis3 |
| PMD-BUQ-08  |        | 1   | 5 60448723 | chr5_604487 | G   | A   | Mis3 |
| PMD-VIA-07C |        | 1   | 5 60448723 | chr5_604487 | G   | A   | Mis3 |
| B00FX00     |        | 0   | 5 60448723 | chr5_604487 | G   | A   | Mis3 |

| Gene    | BaseChange | AChange     | Transcript  | OtherTranscr | MAF       | MAFControls | MAFCases |
|---------|------------|-------------|-------------|--------------|-----------|-------------|----------|
| NDUFAF2 | c.89A>G    | p.Asn30Ser  | NM_174889.4 |              | 0.0004371 | 0           | 0.005435 |
| NDUFAF2 | c.301A>G   | p.Lys101Glu | NM_174889.4 |              | 0.0004437 | 0.0004836   | 0        |
| NDUFAF2 | c.451G>A   | p.Gly151Ser | NM_174889.4 |              | 0.001748  | 0.0004757   | 0.0163   |
| NDUFAF2 | c.451G>A   | p.Gly151Ser | NM_174889.4 |              | 0.001748  | 0.0004757   | 0.0163   |
| NDUFAF2 | c.451G>A   | p.Gly151Ser | NM_174889.4 |              | 0.001748  | 0.0004757   | 0.0163   |
| NDUFAF2 | c.451G>A   | p.Gly151Ser | NM_174889.4 |              | 0.001748  | 0.0004757   | 0.0163   |

| ExAC_ALL_AF | ExAC_NFE_AI | ExAC_SAS_AF | ExAC_AMR_A | ExAC_AFR_AF | ExAC_EAS_AF | ExAC_OTH_A | ExAC_FIN_AF |
|-------------|-------------|-------------|------------|-------------|-------------|------------|-------------|
| NA          | NA          | NA          | NA         | NA          | NA          | NA         | NA          |
| 2.268e-05   | 4.818e-05   | 0           | 0          | 0           | 0           | 0          | 0           |
| 0.0053      | 0.0070      | 0.0007      | 0.0008     | 0.0003      | 0           | 0.0061     | 0.0215      |
| 0.0053      | 0.0070      | 0.0007      | 0.0008     | 0.0003      | 0           | 0.0061     | 0.0215      |
| 0.0053      | 0.0070      | 0.0007      | 0.0008     | 0.0003      | 0           | 0.0061     | 0.0215      |
| 0.0053      | 0.0070      | 0.0007      | 0.0008     | 0.0003      | 0           | 0.0061     | 0.0215      |

| ExAC_maxPO SIFT |       | Polyphen2_H Mutation_taspLI score |     | gTEX_Mean_ | gTEX_mean_ | gTEX_mean_ |       |
|-----------------|-------|-----------------------------------|-----|------------|------------|------------|-------|
| NA              | D,D,. | D,.                               | D,D | 3.86E-07   | 11.7       | 10.65      | 12.04 |
| 4.818e-05       | D     | D                                 | D   | 3.86E-07   | 11.7       | 10.65      | 12.04 |
| 0.0215          | D     | D                                 | D   | 3.86E-07   | 11.7       | 10.65      | 12.04 |
| 0.0215          | D     | D                                 | D   | 3.86E-07   | 11.7       | 10.65      | 12.04 |
| 0.0215          | D     | D                                 | D   | 3.86E-07   | 11.7       | 10.65      | 12.04 |
| 0.0215          | D     | D                                 | D   | 3.86E-07   | 11.7       | 10.65      | 12.04 |



gTEX\_Diff\_Exp\_brain/other

0.884

0.884

0.884

0.884

0.884

0.884

| Sample      | Status | Chr | Position   | ID          | Ref | Alt | Type |
|-------------|--------|-----|------------|-------------|-----|-----|------|
| PMD-BOC-08  |        | 1   | 6 33231323 | chr6_332313 | G   | A   | Mis3 |
| B00GWBA     |        | 0   | 6 33234999 | chr6_332349 | A   | G   | Mis3 |
| B00GG7C     |        | 0   | 6 33236290 | chr6_332362 | G   | A   | Mis3 |
| 21803       |        | 0   | 6 33236299 | chr6_332362 | C   | T   | Mis3 |
| PMD-LEF-093 |        | 1   | 6 33236299 | chr6_332362 | C   | T   | Mis3 |
| ROU-LEB-144 |        | 0   | 6 33236906 | chr6_332369 | G   | A   | Mis3 |
| PMD-ROY-08  |        | 1   | 6 33236926 | chr6_332369 | C   | G   | Mis3 |
| PMD-MAL-08  |        | 1   | 6 33236926 | chr6_332369 | C   | G   | Mis3 |
| B00GG7F     |        | 0   | 6 33237527 | chr6_332375 | G   | A   | Mis3 |
| PMD-HER-08  |        | 1   | 6 33237584 | chr6_332375 | G   | A   | Mis3 |

| Gene  | BaseChange | AChange     | Transcript  | OtherTranscr         | MAF       | MAFControls | MAFCases |
|-------|------------|-------------|-------------|----------------------|-----------|-------------|----------|
| VPS52 | c.1732C>T  | p.Arg578Trp | NM_022553.1 | Mis3:NM_00:0.0004371 |           | 0           | 0.005435 |
| VPS52 | c.1091T>C  | p.Leu364Pro | NM_022553.1 | Mis3:NM_00:0.0004371 | 0.0004757 |             | 0        |
| VPS52 | c.685C>T   | p.Arg229Trp | NM_022553.1 | Mis3:NM_00:0.0004371 | 0.0004757 |             | 0        |
| VPS52 | c.676G>A   | p.Val226Met | NM_022553.1 | Mis3:NM_00:0.0008741 | 0.0004757 | 0.005435    |          |
| VPS52 | c.676G>A   | p.Val226Met | NM_022553.1 | Mis3:NM_00:0.0008741 | 0.0004757 | 0.005435    |          |
| VPS52 | c.433C>T   | p.Arg145Trp | NM_022553.1 | Mis3:NM_00:0.0004371 | 0.0004757 |             | 0        |
| VPS52 | c.413G>C   | p.Ser138Thr | NM_022553.1 | Mis3:NM_00:0.0008741 |           | 0           | 0.01087  |
| VPS52 | c.413G>C   | p.Ser138Thr | NM_022553.1 | Mis3:NM_00:0.0008741 |           | 0           | 0.01087  |
| VPS52 | c.298C>T   | p.Arg100Trp | NM_022553.1 | Mis3:NM_00:0.0004386 | 0.0004776 |             | 0        |
| VPS52 | c.241C>T   | p.Arg81Cys  | NM_022553.1 | Mis3:NM_00:0.0004371 |           | 0           | 0.005435 |

| ExAC_ALL_AF | ExAC_NFE_AI | ExAC_SAS_AF | ExAC_AMR_A | ExAC_AFR_AI | ExAC_EAS_AF | ExAC_OTH_A | ExAC_FIN_AF |
|-------------|-------------|-------------|------------|-------------|-------------|------------|-------------|
| 9.908e-05   | 0.0002      | 0           | 0          | 0.0002      | 0           | 0          | 0           |
| NA          | NA          | NA          | NA         | NA          | NA          | NA         | NA          |
| 1.775e-05   | 3.212e-05   | 0           | 0          | 0           | 0           | 0          | 0           |
| 3.503e-05   | 1.596e-05   | 6.678e-05   | 0          | 0           | 0.0002      | 0          | 0           |
| 3.503e-05   | 1.596e-05   | 6.678e-05   | 0          | 0           | 0.0002      | 0          | 0           |
| 3.439e-05   | 6.31e-05    | 0           | 0          | 0           | 0           | 0          | 0           |
| 6.021e-05   | 7.891e-05   | 0           | 0          | 0.0002      | 0           | 0          | 0           |
| 6.021e-05   | 7.891e-05   | 0           | 0          | 0.0002      | 0           | 0          | 0           |
| 8.32e-06    | 1.511e-05   | 0           | 0          | 0           | 0           | 0          | 0           |
| 7.468e-05   | 0.0001      | 0           | 8.735e-05  | 0           | 0           | 0          | 0           |

| ExAC_maxPO SIFT | Polyphen2_H Mutation_taspLI score | gTEX_Mean  | gTEX_mean | gTEX_mean   |
|-----------------|-----------------------------------|------------|-----------|-------------|
| 0.0002 D,D,D    | D,D D                             | 0.01596326 | 13.12     | 10.36 14.02 |
| NA D,D,D        | D D                               | 0.01596326 | 13.12     | 10.36 14.02 |
| 3.212e-05 D,D,D | D,D,D D                           | 0.01596326 | 13.12     | 10.36 14.02 |
| 0.0002 D,D,D    | D,P,D D                           | 0.01596326 | 13.12     | 10.36 14.02 |
| 0.0002 D,D,D    | D,P,D D                           | 0.01596326 | 13.12     | 10.36 14.02 |
| 6.31e-05 D,D,D  | D,D,D D                           | 0.01596326 | 13.12     | 10.36 14.02 |
| 0.0002 D,D,D    | P,P,P D                           | 0.01596326 | 13.12     | 10.36 14.02 |
| 0.0002 D,D,D    | P,P,P D                           | 0.01596326 | 13.12     | 10.36 14.02 |
| 1.511e-05 D,D   | D,D D                             | 0.01596326 | 13.12     | 10.36 14.02 |
| 0.0001 D,D      | D,D D                             | 0.01596326 | 13.12     | 10.36 14.02 |

gTEX\_Diff\_Exp\_brain/other

0.739

0.739

0.739

0.739

0.739

0.739

0.739

0.739

0.739

0.739

| Sample       | Status | Chr | Position | ID          | Ref | Alt | Type |
|--------------|--------|-----|----------|-------------|-----|-----|------|
| ROU-REN-472  | 0      | 6   | 43395717 | chr6_433957 | A   | G   | PTV  |
| MET01-225    | 1      | 6   | 43395717 | chr6_433957 | A   | G   | PTV  |
| B00FWWM      | 0      | 6   | 43395717 | chr6_433957 | A   | G   | PTV  |
| 21352        | 0      | 6   | 43395733 | chr6_433957 | C   | T   | Mis1 |
| ROU-DUH-43   | 0      | 6   | 43399957 | chr6_433999 | C   | T   | Mis1 |
| 21483        | 0      | 6   | 43400205 | chr6_434002 | C   | G   | Mis3 |
| B00G74W      | 0      | 6   | 43400205 | chr6_434002 | C   | G   | Mis3 |
| B00GQCF      | 0      | 6   | 43400205 | chr6_434002 | C   | G   | Mis3 |
| PMis2-ETA-05 | 1      | 6   | 43400205 | chr6_434002 | C   | G   | Mis3 |
| 21727        | 0      | 6   | 43400205 | chr6_434002 | C   | G   | Mis3 |
| B00GQBK      | 0      | 6   | 43400205 | chr6_434002 | C   | G   | Mis3 |
| B00G7LO      | 0      | 6   | 43400205 | chr6_434002 | C   | G   | Mis3 |
| PMis2-LAF-07 | 1      | 6   | 43400442 | chr6_434004 | C   | T   | Mis2 |
| B00G74G      | 0      | 6   | 43400500 | chr6_434005 | G   | A   | Mis1 |
| PMis2-HER-01 | 1      | 6   | 43400500 | chr6_434005 | G   | A   | Mis1 |
| B00G72R      | 0      | 6   | 43400500 | chr6_434005 | G   | A   | Mis1 |
| 23247        | 0      | 6   | 43400500 | chr6_434005 | G   | A   | Mis1 |
| 21463        | 0      | 6   | 43400500 | chr6_434005 | G   | A   | Mis1 |
| B00FWXM      | 0      | 6   | 43400500 | chr6_434005 | G   | A   | Mis1 |
| B00G73U      | 0      | 6   | 43400500 | chr6_434005 | G   | A   | Mis1 |
| B00G7LP      | 0      | 6   | 43400500 | chr6_434005 | G   | A   | Mis1 |
| PMis2-LEC-08 | 1      | 6   | 43400500 | chr6_434005 | G   | A   | Mis1 |
| 23041        | 0      | 6   | 43400500 | chr6_434005 | G   | A   | Mis1 |
| ROU-PAI-560  | 0      | 6   | 43400500 | chr6_434005 | G   | A   | Mis1 |
| B00G7KX      | 0      | 6   | 43400500 | chr6_434005 | G   | A   | Mis1 |
| ROU-JOL-330  | 0      | 6   | 43400500 | chr6_434005 | G   | A   | Mis1 |
| PMis2-LOG-0  | 1      | 6   | 43400500 | chr6_434005 | G   | A   | Mis1 |
| 21839        | 0      | 6   | 43400500 | chr6_434005 | G   | A   | Mis1 |
| B00FWX2      | 0      | 6   | 43400500 | chr6_434005 | G   | A   | Mis1 |
| B00GG7C      | 0      | 6   | 43400785 | chr6_434007 | G   | A   | Mis3 |
| B00GG80      | 0      | 6   | 43400839 | chr6_434008 | G   | A   | Mis3 |
| B00GQDW      | 0      | 6   | 43400841 | chr6_434008 | C   | T   | Mis1 |
| B00G7LO      | 0      | 6   | 43400850 | chr6_434008 | G   | A   | Mis3 |
| B00FWXV      | 0      | 6   | 43401027 | chr6_434010 | A   | G   | Mis3 |
| B00GG7U      | 0      | 6   | 43401027 | chr6_434010 | A   | G   | Mis3 |
| 20720        | 0      | 6   | 43401027 | chr6_434010 | A   | G   | Mis3 |
| PMis2-MAL-0  | 1      | 6   | 43401027 | chr6_434010 | A   | G   | Mis3 |
| 20180        | 0      | 6   | 43401027 | chr6_434010 | A   | G   | Mis3 |
| 21291        | 0      | 6   | 43401027 | chr6_434010 | A   | G   | Mis3 |
| 20197        | 0      | 6   | 43401027 | chr6_434010 | A   | G   | Mis3 |
| B00GG7F      | 0      | 6   | 43402567 | chr6_434025 | A   | G   | Mis3 |
| 22004        | 0      | 6   | 43403556 | chr6_434035 | A   | G   | Mis3 |
| B00GWAJ      | 0      | 6   | 43403556 | chr6_434035 | A   | G   | Mis3 |
| B00GWBS      | 0      | 6   | 43403556 | chr6_434035 | A   | G   | Mis3 |
| PMis2-SCH-01 | 1      | 6   | 43406448 | chr6_434064 | G   | A   | Mis3 |
| 24688        | 0      | 6   | 43406475 | chr6_434064 | T   | C   | Mis3 |
| 20480        | 0      | 6   | 43406522 | chr6_434065 | G   | T   | Mis3 |
| PMis2-DEL-08 | 1      | 6   | 43409667 | chr6_434096 | C   | T   | Mis3 |
| PMis2-GAI-09 | 1      | 6   | 43410879 | chr6_434108 | G   | A   | Mis3 |

|              |   |   |          |             |   |   |      |
|--------------|---|---|----------|-------------|---|---|------|
| B00G72T      | 0 | 6 | 43410891 | chr6_434108 | C | T | Mis2 |
| B00GQD0      | 0 | 6 | 43412080 | chr6_434120 | T | C | Mis3 |
| PMis2-VIA-07 | 1 | 6 | 43413026 | chr6_434130 | C | T | Mis1 |
| 21221        | 0 | 6 | 43413041 | chr6_434130 | C | T | PTV  |
| B00GG7M      | 0 | 6 | 43413442 | chr6_434134 | C | T | Mis1 |
| B00FWYE      | 0 | 6 | 43413442 | chr6_434134 | C | T | Mis1 |
| MET01-058    | 1 | 6 | 43413550 | chr6_434135 | C | T | PTV  |
| B00GWBR      | 0 | 6 | 43413643 | chr6_434136 | G | C | Mis3 |
| 20352        | 0 | 6 | 43413652 | chr6_434136 | G | A | Mis3 |
| 22356        | 0 | 6 | 43413652 | chr6_434136 | G | A | Mis3 |
| ROU-ETI-678- | 0 | 6 | 43413652 | chr6_434136 | G | A | Mis3 |
| B00G7L7      | 0 | 6 | 43413652 | chr6_434136 | G | A | Mis3 |
| ROU-PAN-60:  | 0 | 6 | 43413652 | chr6_434136 | G | A | Mis3 |
| ROU-FAU-14:  | 0 | 6 | 43413652 | chr6_434136 | G | A | Mis3 |
| 22044        | 0 | 6 | 43413652 | chr6_434136 | G | A | Mis3 |
| 21128        | 0 | 6 | 43413652 | chr6_434136 | G | A | Mis3 |
| 21915        | 0 | 6 | 43413652 | chr6_434136 | G | A | Mis3 |
| B00GQF4      | 0 | 6 | 43413652 | chr6_434136 | G | A | Mis3 |
| 21794        | 0 | 6 | 43413652 | chr6_434136 | G | A | Mis3 |
| PMis2-FAM-C  | 1 | 6 | 43413652 | chr6_434136 | G | A | Mis3 |
| 21911        | 0 | 6 | 43413652 | chr6_434136 | G | A | Mis3 |
| B00GG5L      | 0 | 6 | 43413658 | chr6_434136 | C | T | Mis3 |
| B00G73K      | 0 | 6 | 43413658 | chr6_434136 | C | T | Mis3 |
| B00G7LP      | 0 | 6 | 43415084 | chr6_434150 | G | A | Mis3 |
| ROU-LEB-171  | 0 | 6 | 43415578 | chr6_434155 | T | C | Mis3 |
| ROU-CLA-516  | 0 | 6 | 43415672 | chr6_434156 | T | C | Mis3 |
| 21407        | 0 | 6 | 43416639 | chr6_434166 | C | T | Mis3 |
| 20148        | 0 | 6 | 43416765 | chr6_434167 | G | C | PTV  |
| PMis2-VIG-08 | 1 | 6 | 43416869 | chr6_434168 | A | C | Mis3 |
| B00G720      | 0 | 6 | 43416877 | chr6_434168 | C | T | Mis2 |
| PMis2-LEN-09 | 1 | 6 | 43417746 | chr6_434177 | C | A | Mis3 |
| B00FWX7      | 0 | 6 | 43417795 | chr6_434177 | A | G | Mis1 |





|        |             |              |            |                      |           |            |   |
|--------|-------------|--------------|------------|----------------------|-----------|------------|---|
| ABCC10 | c.2410C>T   | p.Arg804Trp  | NM_0011989 | Mis2:NM_03:0.0004517 | 0.0004921 |            | 0 |
| ABCC10 | c.2678T>C   | p.Leu893Pro  | NM_0011989 | Mis3:NM_03:0.0004378 | 0.0004766 |            | 0 |
| ABCC10 | c.3004C>T   | p.Arg1002Cys | NM_0011989 | Mis1:NM_03:0.0004371 |           | 0 0.005435 |   |
| ABCC10 | c.3019C>T   | p.Arg1007*   | NM_0011989 | PTV:NM_033 0.0004371 | 0.0004757 |            | 0 |
| ABCC10 | c.3136C>T   | p.Leu1046Phe | NM_0011989 | Mis1:NM_03:0.0008741 | 0.0009515 |            | 0 |
| ABCC10 | c.3136C>T   | p.Leu1046Phe | NM_0011989 | Mis1:NM_03:0.0008741 | 0.0009515 |            | 0 |
| ABCC10 | c.3244C>T   | p.Gln1082*   | NM_0011989 | PTV:NM_033 0.0004371 |           | 0 0.005435 |   |
| ABCC10 | c.3337G>C   | p.Gly1113Arg | NM_0011989 | Mis3:NM_03:0.0004371 | 0.0004757 |            | 0 |
| ABCC10 | c.3346G>A   | p.Val1116Met | NM_0011989 | Mis3:NM_03:0.005682  | 0.005709  | 0.005435   |   |
| ABCC10 | c.3346G>A   | p.Val1116Met | NM_0011989 | Mis3:NM_03:0.005682  | 0.005709  | 0.005435   |   |
| ABCC10 | c.3346G>A   | p.Val1116Met | NM_0011989 | Mis3:NM_03:0.005682  | 0.005709  | 0.005435   |   |
| ABCC10 | c.3346G>A   | p.Val1116Met | NM_0011989 | Mis3:NM_03:0.005682  | 0.005709  | 0.005435   |   |
| ABCC10 | c.3346G>A   | p.Val1116Met | NM_0011989 | Mis3:NM_03:0.005682  | 0.005709  | 0.005435   |   |
| ABCC10 | c.3346G>A   | p.Val1116Met | NM_0011989 | Mis3:NM_03:0.005682  | 0.005709  | 0.005435   |   |
| ABCC10 | c.3346G>A   | p.Val1116Met | NM_0011989 | Mis3:NM_03:0.005682  | 0.005709  | 0.005435   |   |
| ABCC10 | c.3346G>A   | p.Val1116Met | NM_0011989 | Mis3:NM_03:0.005682  | 0.005709  | 0.005435   |   |
| ABCC10 | c.3346G>A   | p.Val1116Met | NM_0011989 | Mis3:NM_03:0.005682  | 0.005709  | 0.005435   |   |
| ABCC10 | c.3346G>A   | p.Val1116Met | NM_0011989 | Mis3:NM_03:0.005682  | 0.005709  | 0.005435   |   |
| ABCC10 | c.3346G>A   | p.Val1116Met | NM_0011989 | Mis3:NM_03:0.005682  | 0.005709  | 0.005435   |   |
| ABCC10 | c.3346G>A   | p.Val1116Met | NM_0011989 | Mis3:NM_03:0.005682  | 0.005709  | 0.005435   |   |
| ABCC10 | c.3346G>A   | p.Val1116Met | NM_0011989 | Mis3:NM_03:0.005682  | 0.005709  | 0.005435   |   |
| ABCC10 | c.3346G>A   | p.Val1116Met | NM_0011989 | Mis3:NM_03:0.005682  | 0.005709  | 0.005435   |   |
| ABCC10 | c.3346G>A   | p.Val1116Met | NM_0011989 | Mis3:NM_03:0.005682  | 0.005709  | 0.005435   |   |
| ABCC10 | c.3352C>T   | p.Arg1118Trp | NM_0011989 | Mis3:NM_03:0.0008741 | 0.0009515 |            | 0 |
| ABCC10 | c.3352C>T   | p.Arg1118Trp | NM_0011989 | Mis3:NM_03:0.0008741 | 0.0009515 |            | 0 |
| ABCC10 | c.3643G>A   | p.Val1215Ile | NM_0011989 | Mis3:NM_03:0.0004371 | 0.0004757 |            | 0 |
| ABCC10 | c.3862T>C   | p.Ser1288Pro | NM_0011989 | Mis3:NM_03:0.0004371 | 0.0004757 |            | 0 |
| ABCC10 | c.3956T>C   | p.Leu1319Pro | NM_0011989 | Mis3:NM_03:0.0004371 | 0.0004757 |            | 0 |
| ABCC10 | c.3980C>T   | p.Pro1327Leu | NM_0011989 | Mis3:NM_03:0.0004371 | 0.0004757 |            | 0 |
| ABCC10 | c.4105+1G>C |              | NM_0011989 | PTV:NM_033 0.0004371 | 0.0004757 |            | 0 |
| ABCC10 | c.4130A>C   | p.Glu1377Ala | NM_0011989 | Mis3:NM_03:0.0004371 |           | 0 0.005435 |   |
| ABCC10 | c.4138C>T   | p.Arg1380Trp | NM_0011989 | Mis2:NM_03:0.0004371 | 0.0004757 |            | 0 |
| ABCC10 | c.4396C>A   | p.Leu1466Met | NM_0011989 | Mis3:NM_03:0.0004378 |           | 0 0.005435 |   |
| ABCC10 | c.4445A>G   | p.Gln1482Arg | NM_0011989 | Mis1:NM_03:0.0004413 | 0.0004798 |            | 0 |

| ExAC_ALL_AF | ExAC_NFE_AI | ExAC_SAS_AF | ExAC_AMR_# | ExAC_AFR_AI | ExAC_EAS_AF | ExAC_OTH_A | ExAC_FIN_AF |        |
|-------------|-------------|-------------|------------|-------------|-------------|------------|-------------|--------|
| 0.0003      | 0.0005      |             | 0          | 0.0004      |             | 0          | 0           | 0.0002 |
| 0.0003      | 0.0005      |             | 0          | 0.0004      |             | 0          | 0           | 0.0002 |
| 0.0003      | 0.0005      |             | 0          | 0.0004      |             | 0          | 0           | 0.0002 |
| NA          | NA          | NA          | NA         | NA          | NA          | NA         | NA          |        |
| 1.648e-05   | 1.499e-05   | 6.056e-05   |            | 0           | 0           | 0          | 0           | 0      |
| 0.0010      | 0.0016      | 6.056e-05   | 0.0012     | 0.0002      |             | 0          | 0           | 0.0003 |
| 0.0010      | 0.0016      | 6.056e-05   | 0.0012     | 0.0002      |             | 0          | 0           | 0.0003 |
| 0.0010      | 0.0016      | 6.056e-05   | 0.0012     | 0.0002      |             | 0          | 0           | 0.0003 |
| 0.0010      | 0.0016      | 6.056e-05   | 0.0012     | 0.0002      |             | 0          | 0           | 0.0003 |
| 0.0010      | 0.0016      | 6.056e-05   | 0.0012     | 0.0002      |             | 0          | 0           | 0.0003 |
| 0.0010      | 0.0016      | 6.056e-05   | 0.0012     | 0.0002      |             | 0          | 0           | 0.0003 |
| 0.0010      | 0.0016      | 6.056e-05   | 0.0012     | 0.0002      |             | 0          | 0           | 0.0003 |
| 1.674e-05   | 3.058e-05   |             | 0          | 0           | 0           | 0          | 0           | 0      |
| 0.0035      | 0.0054      | 6.058e-05   | 0.0035     | 0.0012      |             | 0          | 0.0044      | 0.0003 |
| 0.0035      | 0.0054      | 6.058e-05   | 0.0035     | 0.0012      |             | 0          | 0.0044      | 0.0003 |
| 0.0035      | 0.0054      | 6.058e-05   | 0.0035     | 0.0012      |             | 0          | 0.0044      | 0.0003 |
| 0.0035      | 0.0054      | 6.058e-05   | 0.0035     | 0.0012      |             | 0          | 0.0044      | 0.0003 |
| 0.0035      | 0.0054      | 6.058e-05   | 0.0035     | 0.0012      |             | 0          | 0.0044      | 0.0003 |
| 0.0035      | 0.0054      | 6.058e-05   | 0.0035     | 0.0012      |             | 0          | 0.0044      | 0.0003 |
| 0.0035      | 0.0054      | 6.058e-05   | 0.0035     | 0.0012      |             | 0          | 0.0044      | 0.0003 |
| 0.0035      | 0.0054      | 6.058e-05   | 0.0035     | 0.0012      |             | 0          | 0.0044      | 0.0003 |
| 0.0035      | 0.0054      | 6.058e-05   | 0.0035     | 0.0012      |             | 0          | 0.0044      | 0.0003 |
| 0.0035      | 0.0054      | 6.058e-05   | 0.0035     | 0.0012      |             | 0          | 0.0044      | 0.0003 |
| 0.0035      | 0.0054      | 6.058e-05   | 0.0035     | 0.0012      |             | 0          | 0.0044      | 0.0003 |
| 0.0035      | 0.0054      | 6.058e-05   | 0.0035     | 0.0012      |             | 0          | 0.0044      | 0.0003 |
| 0.0035      | 0.0054      | 6.058e-05   | 0.0035     | 0.0012      |             | 0          | 0.0044      | 0.0003 |
| 0.0035      | 0.0054      | 6.058e-05   | 0.0035     | 0.0012      |             | 0          | 0.0044      | 0.0003 |
| 0.0035      | 0.0054      | 6.058e-05   | 0.0035     | 0.0012      |             | 0          | 0.0044      | 0.0003 |
| 0.0035      | 0.0054      | 6.058e-05   | 0.0035     | 0.0012      |             | 0          | 0.0044      | 0.0003 |
| 0.0035      | 0.0054      | 6.058e-05   | 0.0035     | 0.0012      |             | 0          | 0.0044      | 0.0003 |
| 0.0035      | 0.0054      | 6.058e-05   | 0.0035     | 0.0012      |             | 0          | 0.0044      | 0.0003 |
| 2.473e-05   | 3.00E-05    |             | 0          | 0           | 9.617e-05   | 0          | 0           | 0      |
| 7.416e-05   | 0.0001      | 0.0001      |            | 0           | 0           | 0          | 0           | 0      |
| 0.0001      | 0.0002      |             | 0          | 0           | 0           | 0          | 0           | 0      |
| 0.0002      | 0.0003      |             | 0          | 0.0009      | 0.0002      | 0          | 0           | 0      |
| 0.0034      | 0.0052      | 0.0002      | 0.0027     | 0.0010      | 0.0001      | 0.0022     | 0.0032      |        |
| 0.0034      | 0.0052      | 0.0002      | 0.0027     | 0.0010      | 0.0001      | 0.0022     | 0.0032      |        |
| 0.0034      | 0.0052      | 0.0002      | 0.0027     | 0.0010      | 0.0001      | 0.0022     | 0.0032      |        |
| 0.0034      | 0.0052      | 0.0002      | 0.0027     | 0.0010      | 0.0001      | 0.0022     | 0.0032      |        |
| 0.0034      | 0.0052      | 0.0002      | 0.0027     | 0.0010      | 0.0001      | 0.0022     | 0.0032      |        |
| 0.0034      | 0.0052      | 0.0002      | 0.0027     | 0.0010      | 0.0001      | 0.0022     | 0.0032      |        |
| 0.0034      | 0.0052      | 0.0002      | 0.0027     | 0.0010      | 0.0001      | 0.0022     | 0.0032      |        |
| NA          | NA          | NA          | NA         | NA          | NA          | NA         | NA          |        |
| 7.414e-05   | 1.499e-05   | 0.0002      |            | 0           | 0.0004      | 0.0001     | 0           | 0      |
| 7.414e-05   | 1.499e-05   | 0.0002      |            | 0           | 0.0004      | 0.0001     | 0           | 0      |
| 7.414e-05   | 1.499e-05   | 0.0002      |            | 0           | 0.0004      | 0.0001     | 0           | 0      |
| 8.237e-06   |             | 0           | 0          | 0           | 0           | 0.0001     | 0           | 0      |
| 0.0004      | 0.0006      |             | 0          | 8.637e-05   | 0.0003      |            | 0           | 0      |
| 0.0002      | 7.501e-05   | 0.0010      |            | 0           | 0           | 0          | 0           | 0      |
| NA          | NA          | NA          | NA         | NA          | NA          | NA         | NA          |        |
| 2.632e-05   | 1.575e-05   | 0.0001      |            | 0           | 0           | 0          | 0           | 0      |





|           |         |     |   |          |      |      |     |
|-----------|---------|-----|---|----------|------|------|-----|
| 0.0036    | D,D     | B,D | N | 8.31E-21 | 4.71 | 4.11 | 4.9 |
| NA        | D,D     | D,D | D | 8.31E-21 | 4.71 | 4.11 | 4.9 |
| 0.0005    | D,D     | B,B | N | 8.31E-21 | 4.71 | 4.11 | 4.9 |
| 1.689e-05 |         |     | A | 8.31E-21 | 4.71 | 4.11 | 4.9 |
| 0.0014    | T,T     | B,B | D | 8.31E-21 | 4.71 | 4.11 | 4.9 |
| 0.0014    | T,T     | B,B | D | 8.31E-21 | 4.71 | 4.11 | 4.9 |
| NA        |         |     | A | 8.31E-21 | 4.71 | 4.11 | 4.9 |
| NA        | D,D     | D,D | D | 8.31E-21 | 4.71 | 4.11 | 4.9 |
| 0.0047    | D,D     | P,P | D | 8.31E-21 | 4.71 | 4.11 | 4.9 |
| 0.0047    | D,D     | P,P | D | 8.31E-21 | 4.71 | 4.11 | 4.9 |
| 0.0047    | D,D     | P,P | D | 8.31E-21 | 4.71 | 4.11 | 4.9 |
| 0.0047    | D,D     | P,P | D | 8.31E-21 | 4.71 | 4.11 | 4.9 |
| 0.0047    | D,D     | P,P | D | 8.31E-21 | 4.71 | 4.11 | 4.9 |
| 0.0047    | D,D     | P,P | D | 8.31E-21 | 4.71 | 4.11 | 4.9 |
| 0.0047    | D,D     | P,P | D | 8.31E-21 | 4.71 | 4.11 | 4.9 |
| 0.0047    | D,D     | P,P | D | 8.31E-21 | 4.71 | 4.11 | 4.9 |
| 0.0047    | D,D     | P,P | D | 8.31E-21 | 4.71 | 4.11 | 4.9 |
| 0.0047    | D,D     | P,P | D | 8.31E-21 | 4.71 | 4.11 | 4.9 |
| 0.0047    | D,D     | P,P | D | 8.31E-21 | 4.71 | 4.11 | 4.9 |
| 0.0047    | D,D     | P,P | D | 8.31E-21 | 4.71 | 4.11 | 4.9 |
| 0.0047    | D,D     | P,P | D | 8.31E-21 | 4.71 | 4.11 | 4.9 |
| 0.0047    | D,D     | P,P | D | 8.31E-21 | 4.71 | 4.11 | 4.9 |
| 0.0047    | D,D     | P,P | D | 8.31E-21 | 4.71 | 4.11 | 4.9 |
| 0.0002    | D,D     | D,D | D | 8.31E-21 | 4.71 | 4.11 | 4.9 |
| 0.0002    | D,D     | D,D | D | 8.31E-21 | 4.71 | 4.11 | 4.9 |
| 8.651e-05 | D,D     | D,P | D | 8.31E-21 | 4.71 | 4.11 | 4.9 |
| NA        | D,D,D   | D,D | D | 8.31E-21 | 4.71 | 4.11 | 4.9 |
| NA        | D,D,D   | D,D | D | 8.31E-21 | 4.71 | 4.11 | 4.9 |
| NA        | D,D,D   | D,D | D | 8.31E-21 | 4.71 | 4.11 | 4.9 |
| NA        |         |     | D | 8.31E-21 | 4.71 | 4.11 | 4.9 |
| NA        | D,D,D   | P,P | D | 8.31E-21 | 4.71 | 4.11 | 4.9 |
| 0.0002    | D,D,D   | D,D | N | 8.31E-21 | 4.71 | 4.11 | 4.9 |
| NA        | D,D,D,D | D,D | D | 8.31E-21 | 4.71 | 4.11 | 4.9 |
| 3.053e-05 | T,T,T,T | B,B | D | 8.31E-21 | 4.71 | 4.11 | 4.9 |







| Sample       | Status | Chr | Position | ID       | Ref         | Alt | Type |      |
|--------------|--------|-----|----------|----------|-------------|-----|------|------|
| 22445        |        | 0   | 9        | 15623326 | chr9_156233 | T   | G    | Mis1 |
| ROU-TRA-481  |        | 0   | 9        | 15623346 | chr9_156233 | C   | T    | Mis2 |
| PMis2-BEL-09 |        | 1   | 9        | 15874585 | chr9_158745 | T   | G    | Mis3 |
| 24640        |        | 0   | 9        | 15666309 | chr9_156663 | C   | G    | Mis1 |
| 20225        |        | 0   | 9        | 15695278 | chr9_156952 | G   | A    | Mis1 |
| B00G72A      |        | 0   | 9        | 15695278 | chr9_156952 | G   | A    | Mis1 |
| PMis2-BOU-0  |        | 1   | 9        | 15874585 | chr9_158745 | T   | G    | Mis3 |
| 21666        |        | 0   | 9        | 15721841 | chr9_157218 | T   | C    | Mis2 |
| B00GG7A      |        | 0   | 9        | 15724872 | chr9_157248 | A   | C    | Mis2 |
| PMis2-DEI-08 |        | 1   | 9        | 15971726 | chr9_159717 | C   | G    | Mis1 |
| 20713        |        | 0   | 9        | 15744297 | chr9_157442 | C   | A    | Mis2 |
| PMis2-FOL-09 |        | 1   | 9        | 15727873 | chr9_157278 | C   | G    | Mis2 |
| PMis2-GRO-0  |        | 1   | 9        | 15623346 | chr9_156233 | C   | T    | Mis2 |
| PMis2-LEB-09 |        | 1   | 9        | 15874585 | chr9_158745 | T   | G    | Mis3 |
| ROU-GED-41   |        | 0   | 9        | 15744541 | chr9_157445 | C   | G    | Mis2 |
| B00G727      |        | 0   | 9        | 15745542 | chr9_157455 | C   | G    | Mis1 |
| B00G74K      |        | 0   | 9        | 15745542 | chr9_157455 | C   | G    | Mis1 |
| B00FWWL      |        | 0   | 9        | 15745596 | chr9_157455 | A   | G    | Mis1 |
| 21478        |        | 0   | 9        | 15777618 | chr9_157776 | G   | A    | Mis2 |
| 22167        |        | 0   | 9        | 15784616 | chr9_157846 | A   | T    | Mis3 |
| B00G72B      |        | 0   | 9        | 15846815 | chr9_158468 | A   | G    | Mis3 |
| 22004        |        | 0   | 9        | 15874585 | chr9_158745 | T   | G    | Mis3 |
| PMis2-LEL-09 |        | 1   | 9        | 15744298 | chr9_157442 | A   | G    | Mis1 |
| 20376        |        | 0   | 9        | 15874585 | chr9_158745 | T   | G    | Mis3 |
| PMis2-LEV-07 |        | 1   | 9        | 15721827 | chr9_157218 | G   | T    | Mis1 |
| 22519        |        | 0   | 9        | 15874585 | chr9_158745 | T   | G    | Mis3 |
| B00GG8P      |        | 0   | 9        | 15874585 | chr9_158745 | T   | G    | Mis3 |
| B00G7JY      |        | 0   | 9        | 15874585 | chr9_158745 | T   | G    | Mis3 |
| 22712        |        | 0   | 9        | 15874585 | chr9_158745 | T   | G    | Mis3 |
| B00FWXD      |        | 0   | 9        | 15874585 | chr9_158745 | T   | G    | Mis3 |
| PMis2-LEV-07 |        | 1   | 9        | 15874585 | chr9_158745 | T   | G    | Mis3 |
| PMis2-LOG-0  |        | 1   | 9        | 15744330 | chr9_157443 | TG  | T    | PTV  |
| 20705        |        | 0   | 9        | 15874585 | chr9_158745 | T   | G    | Mis3 |
| B00GQF3      |        | 0   | 9        | 15874585 | chr9_158745 | T   | G    | Mis3 |
| 23730        |        | 0   | 9        | 15874585 | chr9_158745 | T   | G    | Mis3 |
| PMis2-NOT-0  |        | 1   | 9        | 15744298 | chr9_157442 | A   | G    | Mis1 |
| B00GG8C      |        | 0   | 9        | 15874585 | chr9_158745 | T   | G    | Mis3 |
| 23534        |        | 0   | 9        | 15874622 | chr9_158746 | G   | T    | Mis1 |
| R19-001-00   |        | 1   | 9        | 15874585 | chr9_158745 | T   | G    | Mis3 |
| 21032        |        | 0   | 9        | 15971726 | chr9_159717 | C   | G    | Mis1 |
| 20765        |        | 0   | 9        | 15971740 | chr9_159717 | T   | A    | Mis2 |
| B00GWAJ      |        | 0   | 9        | 15971782 | chr9_159717 | C   | T    | Mis2 |
| B00FWYX      |        | 0   | 9        | 15971808 | chr9_159718 | A   | C    | Mis2 |

| Gene    | BaseChange | AAChange     | Transcript  | OtherTranscr | MAF       | MAFControls | MAFCases |
|---------|------------|--------------|-------------|--------------|-----------|-------------|----------|
| CCDC171 | c.737T>G   | p.Met246Arg  | NM_173550.2 |              | 0.0004371 | 0.0004757   | 0        |
| CCDC171 | c.757C>T   | p.Arg253Trp  | NM_173550.2 |              | 0.0008741 | 0.0004757   | 0.005435 |
| CCDC171 | c.3524T>G  | p.Leu1175Arg | NM_173550.2 |              | 0.006993  | 0.005233    | 0.02717  |
| CCDC171 | c.1064C>G  | p.Ala355Gly  | NM_173550.2 |              | 0.0004401 | 0.0004794   | 0        |
| CCDC171 | c.1261G>A  | p.Val421Met  | NM_173550.2 |              | 0.0008741 | 0.0009515   | 0        |
| CCDC171 | c.1261G>A  | p.Val421Met  | NM_173550.2 |              | 0.0008741 | 0.0009515   | 0        |
| CCDC171 | c.3524T>G  | p.Leu1175Arg | NM_173550.2 |              | 0.006993  | 0.005233    | 0.02717  |
| CCDC171 | c.1393T>C  | p.Tyr465His  | NM_173550.2 |              | 0.0004371 | 0.0004757   | 0        |
| CCDC171 | c.1590A>C  | p.Glu530Asp  | NM_173550.2 |              | 0.0004371 | 0.0004757   | 0        |
| CCDC171 | c.3873C>G  | p.Phe1291Leu | NM_173550.2 |              | 0.0008749 | 0.0004762   | 0.005435 |
| CCDC171 | c.2076C>A  | p.Asn692Lys  | NM_173550.2 |              | 0.0004378 | 0.0004766   | 0        |
| CCDC171 | c.1699C>G  | p.Leu567Val  | NM_173550.2 |              | 0.0004371 | 0           | 0.005435 |
| CCDC171 | c.757C>T   | p.Arg253Trp  | NM_173550.2 |              | 0.0008741 | 0.0004757   | 0.005435 |
| CCDC171 | c.3524T>G  | p.Leu1175Arg | NM_173550.2 |              | 0.006993  | 0.005233    | 0.02717  |
| CCDC171 | c.2320C>G  | p.Gln774Glu  | NM_173550.2 |              | 0.0004371 | 0.0004757   | 0        |
| CCDC171 | c.2584C>G  | p.Gln862Glu  | NM_173550.2 |              | 0.0008741 | 0.0009515   | 0        |
| CCDC171 | c.2584C>G  | p.Gln862Glu  | NM_173550.2 |              | 0.0008741 | 0.0009515   | 0        |
| CCDC171 | c.2638A>G  | p.Met880Val  | NM_173550.2 |              | 0.0004371 | 0.0004757   | 0        |
| CCDC171 | c.2692G>A  | p.Gly898Arg  | NM_173550.2 |              | 0.0004371 | 0.0004757   | 0        |
| CCDC171 | c.3191A>T  | p.Gln1064Leu | NM_173550.2 |              | 0.0004374 | 0.0004762   | 0        |
| CCDC171 | c.3383A>G  | p.Asp1128Gly | NM_173550.2 |              | 0.0004371 | 0.0004757   | 0        |
| CCDC171 | c.3524T>G  | p.Leu1175Arg | NM_173550.2 |              | 0.006993  | 0.005233    | 0.02717  |
| CCDC171 | c.2077A>G  | p.Met693Val  | NM_173550.2 |              | 0.0008749 | 0           | 0.01087  |
| CCDC171 | c.3524T>G  | p.Leu1175Arg | NM_173550.2 |              | 0.006993  | 0.005233    | 0.02717  |
| CCDC171 | c.1379G>T  | p.Arg460Leu  | NM_173550.2 |              | 0.0004371 | 0           | 0.005435 |
| CCDC171 | c.3524T>G  | p.Leu1175Arg | NM_173550.2 |              | 0.006993  | 0.005233    | 0.02717  |
| CCDC171 | c.3524T>G  | p.Leu1175Arg | NM_173550.2 |              | 0.006993  | 0.005233    | 0.02717  |
| CCDC171 | c.3524T>G  | p.Leu1175Arg | NM_173550.2 |              | 0.006993  | 0.005233    | 0.02717  |
| CCDC171 | c.3524T>G  | p.Leu1175Arg | NM_173550.2 |              | 0.006993  | 0.005233    | 0.02717  |
| CCDC171 | c.3524T>G  | p.Leu1175Arg | NM_173550.2 |              | 0.006993  | 0.005233    | 0.02717  |
| CCDC171 | c.3524T>G  | p.Leu1175Arg | NM_173550.2 |              | 0.006993  | 0.005233    | 0.02717  |
| CCDC171 | c.2110delG | p.Glu704fs   | NM_173550.2 |              | 0.0004371 | 0           | 0.005435 |
| CCDC171 | c.3524T>G  | p.Leu1175Arg | NM_173550.2 |              | 0.006993  | 0.005233    | 0.02717  |
| CCDC171 | c.3524T>G  | p.Leu1175Arg | NM_173550.2 |              | 0.006993  | 0.005233    | 0.02717  |
| CCDC171 | c.3524T>G  | p.Leu1175Arg | NM_173550.2 |              | 0.006993  | 0.005233    | 0.02717  |
| CCDC171 | c.2077A>G  | p.Met693Val  | NM_173550.2 |              | 0.0008749 | 0           | 0.01087  |
| CCDC171 | c.3524T>G  | p.Leu1175Arg | NM_173550.2 |              | 0.006993  | 0.005233    | 0.02717  |
| CCDC171 | c.3561G>T  | p.Met1187Ile | NM_173550.2 |              | 0.0004371 | 0.0004757   | 0        |
| CCDC171 | c.3524T>G  | p.Leu1175Arg | NM_173550.2 |              | 0.006993  | 0.005233    | 0.02717  |
| CCDC171 | c.3873C>G  | p.Phe1291Leu | NM_173550.2 |              | 0.0008749 | 0.0004762   | 0.005435 |
| CCDC171 | c.3887T>A  | p.Phe1296Tyr | NM_173550.2 |              | 0.0004371 | 0.0004757   | 0        |
| CCDC171 | c.3929C>T  | p.Ser1310Phe | NM_173550.2 |              | 0.0004371 | 0.0004757   | 0        |
| CCDC171 | c.3955A>C  | p.Asn1319His | NM_173550.2 |              | 0.0004371 | 0.0004757   | 0        |



| ExAC_maxPO | SIFT       | Polyphen2_H | Mutation_tas | pLI score | gTEX_Mean_ | gTEX_mean_ | gTEX_mean_ |
|------------|------------|-------------|--------------|-----------|------------|------------|------------|
| 1.5e-05    | T,T,T      | B,B,B,P     | N            | NA        | 0.36       | 0.37       | 0.36       |
| 0.0002     | D,D,D      | D,P,D,D     | N            | NA        | 0.36       | 0.37       | 0.36       |
| 0.0271     | T,T,T,D,.. | D,D,D,.     | D,D          | NA        | 0.36       | 0.37       | 0.36       |
| 0.0003     | T,T        | B,B,B       | D            | NA        | 0.36       | 0.37       | 0.36       |
| 0.0009     | T,T        | B,B,B       | D            | NA        | 0.36       | 0.37       | 0.36       |
| 0.0009     | T,T        | B,B,B       | D            | NA        | 0.36       | 0.37       | 0.36       |
| 0.0271     | T,T,T,D,.. | D,D,D,.     | D,D          | NA        | 0.36       | 0.37       | 0.36       |
| 3.017e-05  | T,T        | D,D,D       | D            | NA        | 0.36       | 0.37       | 0.36       |
| 0.0001     | T,T        | P,P,P       | D            | NA        | 0.36       | 0.37       | 0.36       |
| 0.0015     | T          | B,B         | D            | NA        | 0.36       | 0.37       | 0.36       |
| 0.0012     | T,T        | P,P,P       | D            | NA        | 0.36       | 0.37       | 0.36       |
| 3.316e-05  | T,T        | D,D,D       | D            | NA        | 0.36       | 0.37       | 0.36       |
| 0.0002     | D,D,D      | D,P,D,D     | N            | NA        | 0.36       | 0.37       | 0.36       |
| 0.0271     | T,T,T,D,.. | D,D,D,.     | D,D          | NA        | 0.36       | 0.37       | 0.36       |
| 0.0001     | T,T,T      | P,B,B,P     | D            | NA        | 0.36       | 0.37       | 0.36       |
| NA         | T,T,T,.    | B,B,B,.     | D,D          | NA        | 0.36       | 0.37       | 0.36       |
| NA         | T,T,T,.    | B,B,B,.     | D,D          | NA        | 0.36       | 0.37       | 0.36       |
| 0.0007     | T,T,T      | B,B,B       | D            | NA        | 0.36       | 0.37       | 0.36       |
| NA         | D,D,D      | B,B,B       | D            | NA        | 0.36       | 0.37       | 0.36       |
| NA         | D,D,D,..   | D,D,D,.     | D,D          | NA        | 0.36       | 0.37       | 0.36       |
| 2.062e-05  | D,D,D,..   | D,D,D,.     | D,D          | NA        | 0.36       | 0.37       | 0.36       |
| 0.0271     | T,T,T,D,.. | D,D,D,.     | D,D          | NA        | 0.36       | 0.37       | 0.36       |
| NA         | T,T        | B,B,B       | D            | NA        | 0.36       | 0.37       | 0.36       |
| 0.0271     | T,T,T,D,.. | D,D,D,.     | D,D          | NA        | 0.36       | 0.37       | 0.36       |
| NA         | T,T        | B,B,B       | D            | NA        | 0.36       | 0.37       | 0.36       |
| 0.0271     | T,T,T,D,.. | D,D,D,.     | D,D          | NA        | 0.36       | 0.37       | 0.36       |
| 0.0271     | T,T,T,D,.. | D,D,D,.     | D,D          | NA        | 0.36       | 0.37       | 0.36       |
| 0.0271     | T,T,T,D,.. | D,D,D,.     | D,D          | NA        | 0.36       | 0.37       | 0.36       |
| 0.0271     | T,T,T,D,.. | D,D,D,.     | D,D          | NA        | 0.36       | 0.37       | 0.36       |
| 0.0271     | T,T,T,D,.. | D,D,D,.     | D,D          | NA        | 0.36       | 0.37       | 0.36       |
| 0.0271     | T,T,T,D,.. | D,D,D,.     | D,D          | NA        | 0.36       | 0.37       | 0.36       |
| 0.0271     | T,T,T,D,.. | D,D,D,.     | D,D          | NA        | 0.36       | 0.37       | 0.36       |
| NA         |            |             |              | NA        | 0.36       | 0.37       | 0.36       |
| 0.0271     | T,T,T,D,.. | D,D,D,.     | D,D          | NA        | 0.36       | 0.37       | 0.36       |
| 0.0271     | T,T,T,D,.. | D,D,D,.     | D,D          | NA        | 0.36       | 0.37       | 0.36       |
| 0.0271     | T,T,T,D,.. | D,D,D,.     | D,D          | NA        | 0.36       | 0.37       | 0.36       |
| NA         | T,T        | B,B,B       | D            | NA        | 0.36       | 0.37       | 0.36       |
| 0.0271     | T,T,T,D,.. | D,D,D,.     | D,D          | NA        | 0.36       | 0.37       | 0.36       |
| 0.0005     | T,T,T,T,.. | B,B,B,.     | D,D          | NA        | 0.36       | 0.37       | 0.36       |
| 0.0271     | T,T,T,D,.. | D,D,D,.     | D,D          | NA        | 0.36       | 0.37       | 0.36       |
| 0.0015     | T          | B,B         | D            | NA        | 0.36       | 0.37       | 0.36       |
| 1.499e-05  | D          | B,B         | D            | NA        | 0.36       | 0.37       | 0.36       |
| 1.499e-05  | D          | B,B         | D            | NA        | 0.36       | 0.37       | 0.36       |
| 0.0001     | D          | B,B         | D            | NA        | 0.36       | 0.37       | 0.36       |

gTEX\_Diff\_Exp\_brain/other

1.018

1.018

1.018

1.018

1.018

1.018

1.018

1.018

1.018

1.018

1.018

1.018

1.018

1.018

1.018

1.018

1.018

1.018

1.018

1.018

1.018

1.018

1.018

1.018

1.018

1.018

1.018

1.018

1.018

1.018

1.018

1.018

1.018

1.018

1.018

1.018

1.018

1.018

1.018

1.018

1.018

1.018

1.018
