# Supplementary material for: Identification of potential genetic risk factors for bipolar disorder by whole-exome sequencing
Source: PubMed Central journal article supplement (PMC6281607; doi:10.1038/s41398-018-0291-7), 2018-12-05
Supplement: 41398_2018_291_MOESM2_ESM.pdf [file 41398_2018_291_MOESM2_ESM.pdf]

| GeneNameFisher | Pathogroup               | ncarriers.c | ncases | ncarriers.c | ncontrols |
|----------------|--------------------------|-------------|--------|-------------|-----------|
| ABCC10         | PTV + Mis3 + Mis2 + Mis1 | 15          | 92     | 64          | 1051      |
| ABCC10         | Mis3 + Mis2 + Mis1       | 13          | 92     | 60          | 1051      |
| ACPP           | PTV+ Mis3                | 3           | 92     | 0           | 1051      |
| ACPP           | Mis3                     | 2           | 92     | 0           | 1051      |
| ARHGAP9        | PTV + Mis3 + Mis2 + Mis1 | 11          | 92     | 36          | 1051      |
| ARHGAP9        | Mis3 + Mis2 + Mis1       | 11          | 92     | 33          | 1051      |
| BOC            | PTV + Mis3 + Mis2 + Mis1 | 10          | 92     | 26          | 1051      |
| BOC            | PTV + Mis3 + Mis2        | 7           | 92     | 13          | 1051      |
| BOC            | Mis3 + Mis2 + Mis1       | 10          | 92     | 26          | 1051      |
| CCDC171        | PTV + Mis3 + Mis2 + Mis1 | 11          | 92     | 31          | 1051      |
| CCDC171        | Mis3 + Mis2 + Mis1       | 10          | 92     | 31          | 1051      |
| ERI3           | PTV + Mis3 + Mis2        | 3           | 92     | 0           | 1051      |
| ERI3           | PTV + Mis3 + Mis2 + Mis1 | 3           | 92     | 0           | 1051      |
| ERI3           | Mis3 + Mis2 + Mis1       | 3           | 92     | 0           | 1051      |
| FAM19A3        | PTV + Mis3 + Mis2 + Mis1 | 5           | 92     | 4           | 1051      |
| FAM19A3        | Mis3 + Mis2 + Mis1       | 5           | 92     | 4           | 1051      |
| LGR5           | PTV + Mis3 + Mis2        | 10          | 92     | 31          | 1051      |
| LGR5           | Mis3 + Mis2              | 10          | 92     | 30          | 1051      |
| MYO1E          | PTV + Mis3 + Mis2        | 10          | 92     | 27          | 1051      |
| MYO1E          | Mis3 + Mis2              | 10          | 92     | 27          | 1051      |
| NDUFAF2        | PTV + Mis3               | 4           | 92     | 2           | 1051      |
| NDUFAF2        | PTV + Mis3 + Mis2        | 4           | 92     | 2           | 1051      |
| NDUFAF2        | PTV + Mis3 + Mis2 + Mis1 | 4           | 92     | 2           | 1051      |
| NDUFAF2        | Mis3 + Mis2 + Mis1       | 4           | 92     | 2           | 1051      |
| PLCXD3         | PTV + Mis3               | 3           | 92     | 0           | 1051      |
| PLCXD3         | Mis3                     | 3           | 92     | 0           | 1051      |
| TCF7L1         | PTV + Mis3 + Mis2 + Mis1 | 5           | 92     | 4           | 1051      |
| TCF7L1         | PTV + Mis3 + Mis1        | 4           | 92     | 2           | 1051      |
| TCF7L1         | Mis3 + Mis2 + Mis1       | 4           | 92     | 4           | 1051      |
| VPS52          | PTV + Mis3               | 5           | 92     | 5           | 1051      |
| VPS52          | Mis3                     | 5           | 92     | 5           | 1051      |

| OR  | Clinf | Clsup | p.value |          |
|-----|-------|-------|---------|----------|
|     | 3.00  | 1.51  | 5.64    | 9.23E-04 |
|     | 2.71  | 1.31  | 5.27    | 5.61E-03 |
| Inf |       | 4.78  | Inf     | 5.06E-04 |
| Inf |       | 2.16  | Inf     | 6.41E-03 |
|     | 3.82  | 1.69  | 8.04    | 7.75E-04 |
|     | 4.18  | 1.84  | 8.87    | 4.19E-04 |
|     | 4.80  | 1.99  | 10.72   | 3.09E-04 |
|     | 6.55  | 2.15  | 18.24   | 5.68E-04 |
|     | 4.80  | 1.99  | 10.72   | 3.09E-04 |
|     | 4.46  | 1.95  | 9.53    | 2.68E-04 |
|     | 4.00  | 1.69  | 8.75    | 9.68E-04 |
| Inf |       | 4.78  | Inf     | 5.06E-04 |
| Inf |       | 4.78  | Inf     | 5.06E-04 |
| Inf |       | 4.78  | Inf     | 5.06E-04 |
|     | 14.96 | 3.16  | 76.78   | 2.96E-04 |
|     | 14.96 | 3.16  | 76.78   | 2.96E-04 |
|     | 4.00  | 1.69  | 8.75    | 9.68E-04 |
|     | 4.14  | 1.74  | 9.09    | 7.83E-04 |
|     | 4.61  | 1.92  | 10.26   | 3.95E-04 |
|     | 4.61  | 1.92  | 10.26   | 3.95E-04 |
|     | 23.66 | 3.34  | 263.93  | 5.22E-04 |
|     | 23.66 | 3.34  | 263.93  | 5.22E-04 |
|     | 23.66 | 3.34  | 263.93  | 5.22E-04 |
|     | 23.66 | 3.34  | 263.93  | 5.22E-04 |
| Inf |       | 4.78  | Inf     | 5.06E-04 |
| Inf |       | 4.78  | Inf     | 5.06E-04 |
|     | 14.96 | 3.16  | 76.78   | 2.96E-04 |
|     | 23.66 | 3.34  | 263.93  | 5.22E-04 |
|     | 9.47  | 1.84  | 44.86   | 3.62E-03 |
|     | 11.96 | 2.70  | 53.13   | 5.54E-04 |
|     | 11.96 | 2.70  | 53.13   | 5.54E-04 |
